# Supplementary material
Source: PubMed Central journal article supplement (PMC9974866)
Supplement: NIHMS1869374-supplement-1.pdf [file NIHMS1869374-supplement-1.pdf]

**Supplemental Figure 1.** Peptide heat maps of novel MN antigen candidates, demonstrating enrichment of unique antigen peptides in the index cases and not in other MN samples. A) SEZ6L2; B) VASN; C) EEA1; D) MST1; E) NPR3; F) FCN3; G) CD206. Heat maps from data collected by DIA (A-E) and DDA (F, G) are shown. Instances of missing values are colored white, and are more frequent in DDA data due to stochastic sampling.

**A**

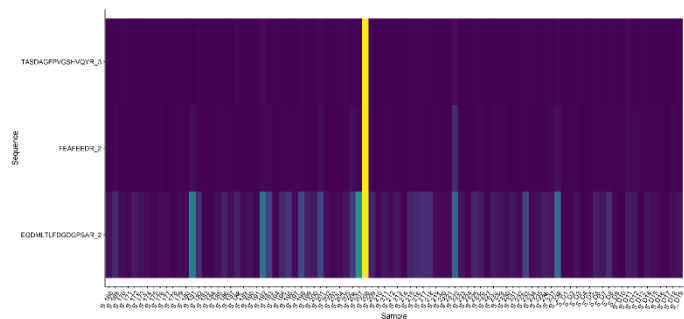

**B**

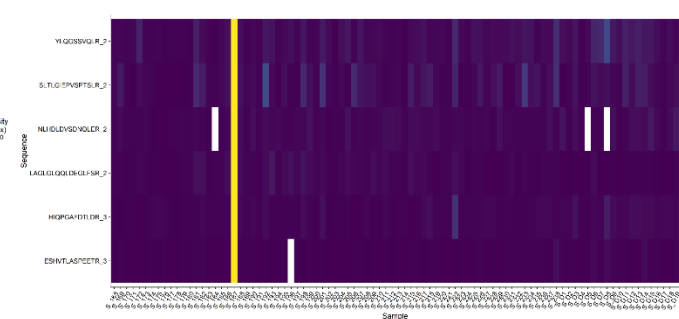

**C**

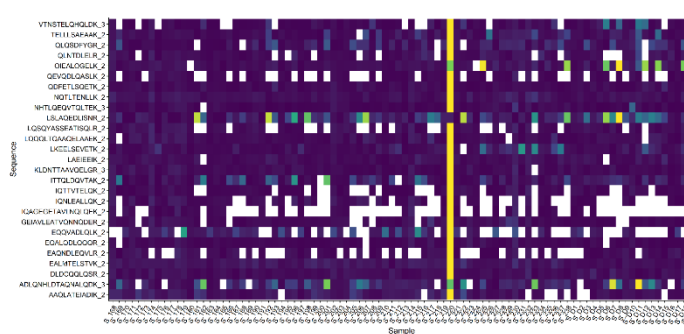

**D**

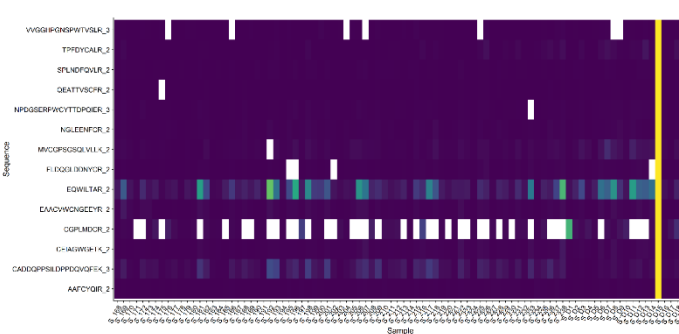

**E**

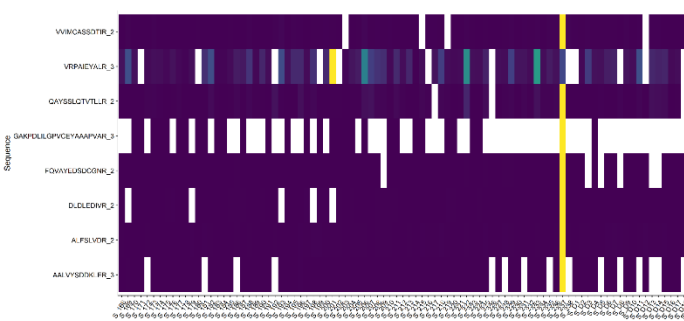

**F**

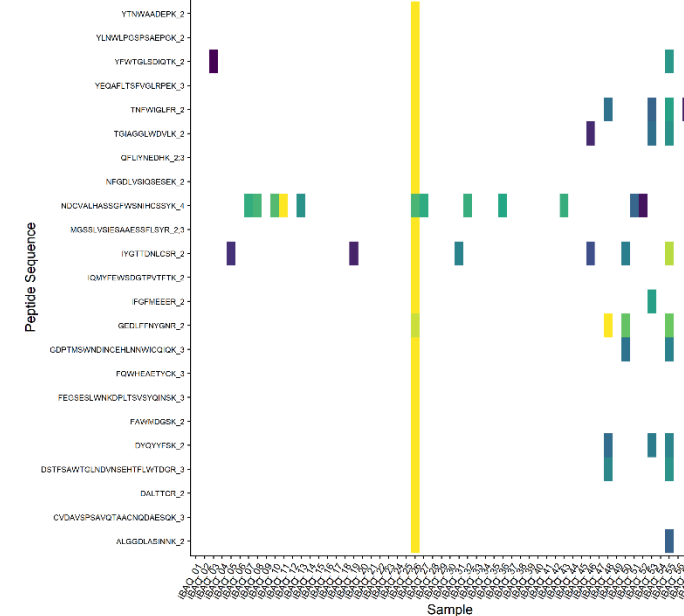

**G**

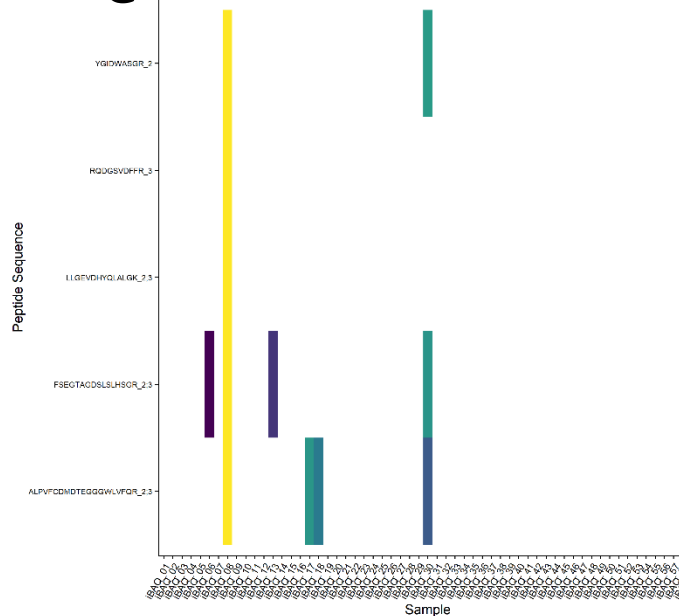



# Supplemental Figure 3. EEA1 mass spectrometry data

**A**

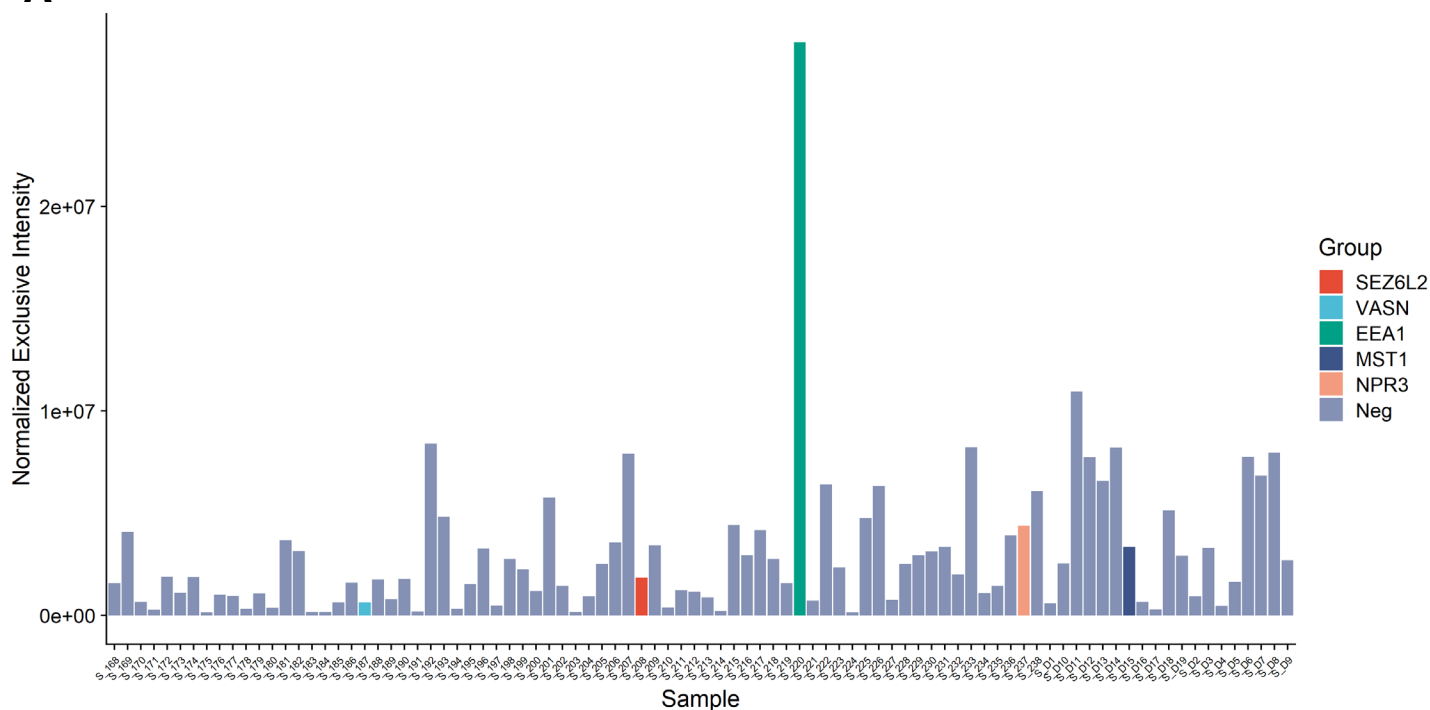

**B**

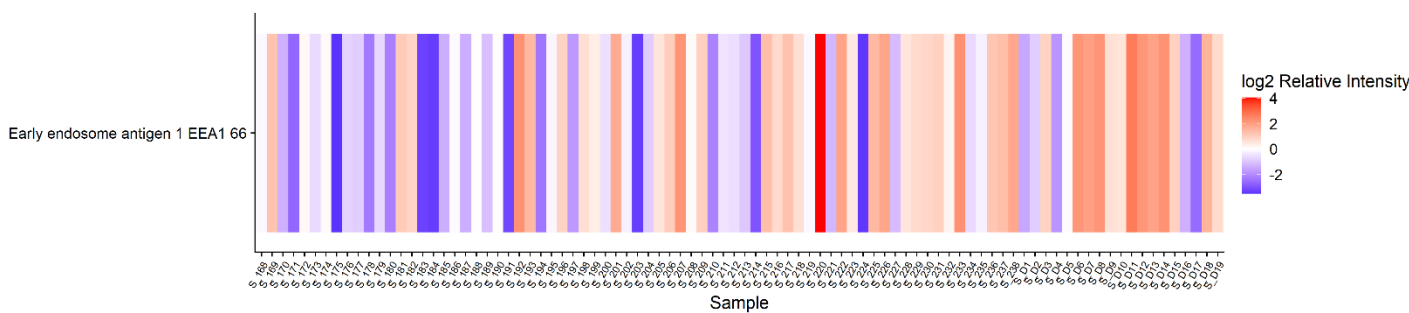

**C**

|                    |                           |     |                             |                    |                    |                    |                    |                    |      |
|--------------------|---------------------------|-----|-----------------------------|--------------------|--------------------|--------------------|--------------------|--------------------|------|
| MLRRILQ RTP        | GRVGSQGS DL               | 20  | TAKLR                       | <b>EAQND</b>       | <b>LEQVLR</b> QIGD | 520                | <b>TQAAQELAAE</b>  | <b>KEKISV</b> LQNN | 1020 |
| DSSATPINTV         | DVNNESSSEG                | 40  | KDQK                        | <b>IQNLEA</b>      | <b>LLQKSK</b> ENIS | 540                | YEKSQETFK <b>Q</b> | <b>LQSDFYGR</b> ES | 1040 |
| FICPQCMK <b>SL</b> | <b>GSADFLFK</b> HY        | 60  | <b>LLEKER</b> EDLY          | AK <b>IQAGEGET</b> | 560                | ELLATRQDLK         | SVEEK <b>LSLAQ</b> | 1060               |      |
| EAVHDAGNDS         | GHHGESNLAL                | 80  | <b>AVLNQLQEK</b> N          | <b>HTLQEQT</b> QL  | 580                | <b>EDLISNR</b> NQI | GNQNKLIQEL         | 1080               |      |
| KRDDVTL <b>LRQ</b> | <b>EVQDLQASL</b> K        | 100 | <b>TEK</b> LKNQSES          | HKQAQENLHD         | 600                | KTAKATLEQD         | SAKKEQQLQE         | 1100               |      |
| E EKWYSEELK        | KELEKYQGLQ                | 120 | QVQEQAHLR                   | AAQDRVLSLE         | 620                | RCKALQDIQK         | EKSLKEKELV         | 1120               |      |
| QQEAKPDGLV         | TDSSAELQSL                | 140 | TSVNELNSQL                  | NESKEKVSQ L        | 640                | NEKSK <b>LAEIE</b> | <b>EIK</b> CRQEKEI | 1140               |      |
| EQQLEEAQTE         | NFNIKQMKDL                | 160 | DIQIKAK <b>TEL</b>          | <b>LLSAAEA</b> KT  | 660                | TKLNEELKSH         | KLESIKEITN         | 1160               |      |
| FEQK <b>AAQLAT</b> | <b>EIADIK</b> SKYD        | 180 | QRADLQNHLD                  | TAQNALQDKQ         | 680                | LKDAKQLLIQ         | QKLELQ GKAD        | 1180               |      |
| EERSLREAAE         | QKVTRLTEEL                | 200 | QELNK <b>ITTQL</b>          | <b>DQVTAK</b> LQDK | 700                | SLKAAVEQEK         | RNQQILKDQV         | 1200               |      |
| NK <b>EATVIQDL</b> | <b>K</b> TELLQRP GI       | 220 | QEHCSQLESH                  | LKEYKEKYL S        | 720                | KKEEEELKKE         | FIEKEAKLHS         | 1220               |      |
| EDVAVLKKEL         | VQVQTLMDNM                | 240 | LEQKTEELEG                  | QIKKLEADSL         | 740                | EIKEKEVGMK         | KHEENEAKLT         | 1240               |      |
| TLERERESEK         | LKDECKK <b>LQS</b>        | 260 | EVKASKE <b>EQAL</b>         | <b>QDLQQQRQL</b> N | 760                | MQITALNENL         | GTVKKEWQSS         | 1260               |      |
| <b>QYASSEATIS</b>  | <b>QLR</b> SELAKGP        | 280 | <b>TDLELR</b> ATEL          | SKQLEMEKEI         | 780                | QRRVSELEKQ         | TDDL <b>RGEIAY</b> | 1280               |      |
| QEVAVYVQEL         | QKLKSSVNEL                | 300 | KLTQKEEEKK                  | ILK <b>QDFETLS</b> | 820                | <b>LEATVQNNQD</b>  | <b>ER</b> RALLERCL | 1300               |      |
| TQK <b>NQTLTEN</b> | <b>LLK</b> KEQDYTK        | 320 | <b>QETK</b> IQHEEL          | NNR <b>IQTTVTE</b> | 840                | KGEGEIEKLQ         | TKVLELQR <b>KL</b> | 1320               |      |
| LEEKHNEESV         | SKKNIQATLH                | 340 | <b>LQK</b> VKMEKE <b>EA</b> | <b>LMTELSTVK</b> D | 860                | <b>DNTTAAVQEL</b>  | <b>GR</b> ENQSLQIK | 1340               |      |
| QK <b>DLDCCQLQ</b> | <b>SR</b> L SASSETSL      | 360 | KLSKVSDSLK                  | NSKSEFEKEN         | 880                | HTQALNRKWA         | EDNEVQNCMA         | 1360               |      |
| HRIHVELSEK         | GEATQK <b>LKEE</b>        | 380 | QKGK <b>AAILDL</b>          | <b>EK</b> TCKELKHQ | 900                | CGKGF SVTVR        | RHHCRCQGN I        | 1380               |      |
| <b>LSEVETK</b> YQH | LKAEFKQLQQ                | 400 | LQVQMENTLK                  | EQKELKKSLE         | 920                | FCAEC SAKNA        | LTPSSK KPVR        | 1400               |      |
| QREEKEQHGL         | QLQSEINQLH                | 420 | KEKEASHQLK                  | LELNSMQEQL         | 940                | VCDACFNDLQ         | G                  |                    |      |
| SKLLETERQL         | GEAHGRLKEQ                | 440 | IQAQNTLKQN                  | EKEEQQLQGN         | 960                |                    |                    |                    |      |
| RQLSSEK LMD        | <b>K</b> <b>EQQVADLQL</b> | 460 | INELKQSSEQ                  | KKK <b>QIEALQG</b> | 980                |                    |                    |                    |      |
| <b>K</b> LSRLEEQLK | EK <b>VTNSTELQ</b>        | 480 | <b>ELK</b> I AVLQKT         | ELENK <b>LQQQL</b> | 1000               |                    |                    |                    |      |
| <b>HQLDK</b> TKQQH | QEQQALQQST                | 500 |                             |                    |                    |                    |                    |                    |      |

# Supplemental Figure 4. MST1 mass spectrometry data

A

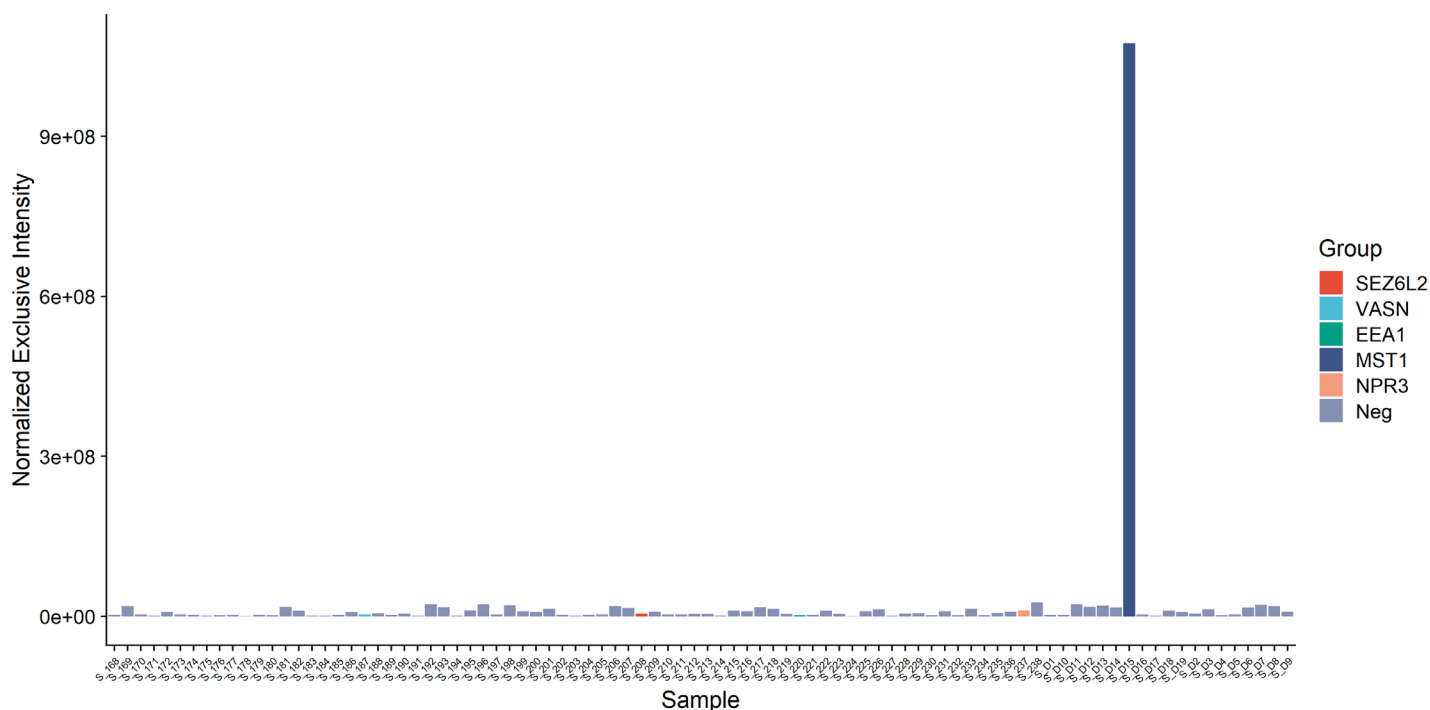

B

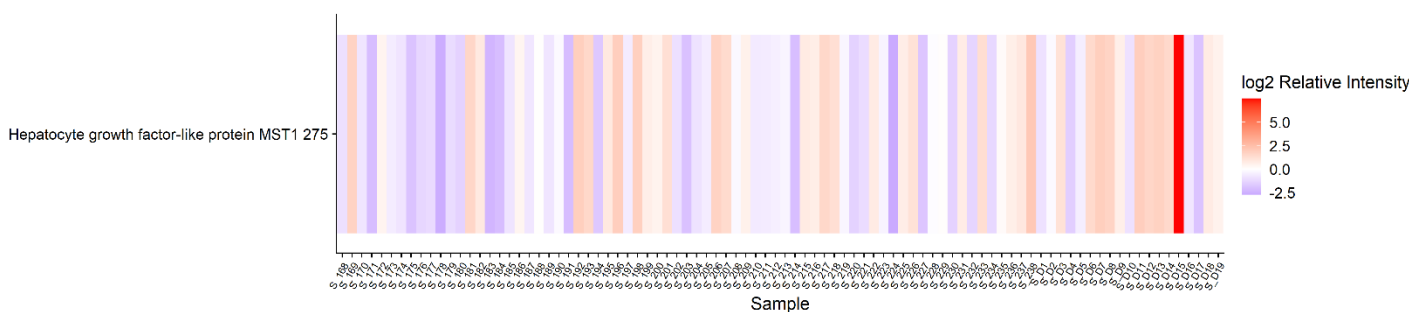

C

|                            |                            |                            |                            |     |
|----------------------------|----------------------------|----------------------------|----------------------------|-----|
| M G W L P L L L L L        | T Q C L G V P G Q R        | <b>S P L N D F Q V L R</b> | G T E L Q H L L H A        | 40  |
| V V P G P W Q E D V        | A D A E E C A G R C        | G P L M D C R A F H        | Y N V S S H G C Q L        | 80  |
| L P W T Q H S P H T        | R L R R S G R C D L        | F Q K K D Y V R T C        | I M N N G V G Y R G        | 120 |
| T M A T T V G G L P        | C Q A W S H K F P N        | D H K Y T P T L R N        | <b>G L E E N F C R</b> N P | 160 |
| D G D P G G P W C Y        | T T D P A V R F Q S        | C G I K S C R <b>E A A</b> | <b>C V W C N G E E Y R</b> | 200 |
| G A V D R T E S G R        | E C Q R W D L Q H P        | H Q H P F E P G K F        | <b>L D Q G L D D N Y C</b> | 240 |
| <b>R N P D G S E R P W</b> | <b>C Y T T D P Q I E R</b> | <b>E F C D L P R</b> C G S | E A Q P R <b>Q E A T T</b> | 280 |
| <b>V S C F R</b> G K G E G | Y R G T A N T T T A        | G V P C Q R W D A Q        | I P H Q H R F T P E        | 320 |
| K Y A C K D L R E N        | F C R N P D G S E A        | P W C F T L R P G M        | R <b>A A F C Y Q I R</b> R | 360 |
| C T D D V R P Q D C        | Y H G A G E Q Y R G        | T V S K T R K G V Q        | C Q R W S A E T P H        | 400 |
| K P Q F T F T S E P        | H A Q L E E N F C R        | N P D G D S H G P W        | C Y T M D P R <b>T P F</b> | 440 |
| <b>D Y C A L R</b> R C A D | D Q P P S I L D P P        | D Q V Q F E K C G K        | R V D R L D Q R R S        | 480 |
| K L R <b>V V G G H P G</b> | <b>N S P W T V S L R</b> N | R Q G Q H F C G G S        | L V K <b>E Q W I L T A</b> | 520 |
| <b>R</b> Q C F S S C H M P | L T G Y E V W L G T        | L F Q N P Q H G E P        | S L Q R V P V A K <b>M</b> | 560 |
| <b>V C G P S G S Q L V</b> | <b>L L K</b> L E R S V T L | N Q R V A L I C L P        | P E W Y V V P P G T        | 600 |
| <b>K C E I A G W G E T</b> | <b>K</b> G T G N D T V L N | V A L L N V I S N Q        | E C N I K H R G R V        | 640 |
| R E S E M C T E G L        | L A P V G A C E G D        | Y G G P L A C F T H        | N C W V L E G I I I        | 680 |
| P N R V C A R S R <b>W</b> | <b>P A V F T R</b> V S V F | V D W I H K V M R L        | G                          |     |



# Supplemental Figure 5. NPR3 mass spectrometry data

**A**

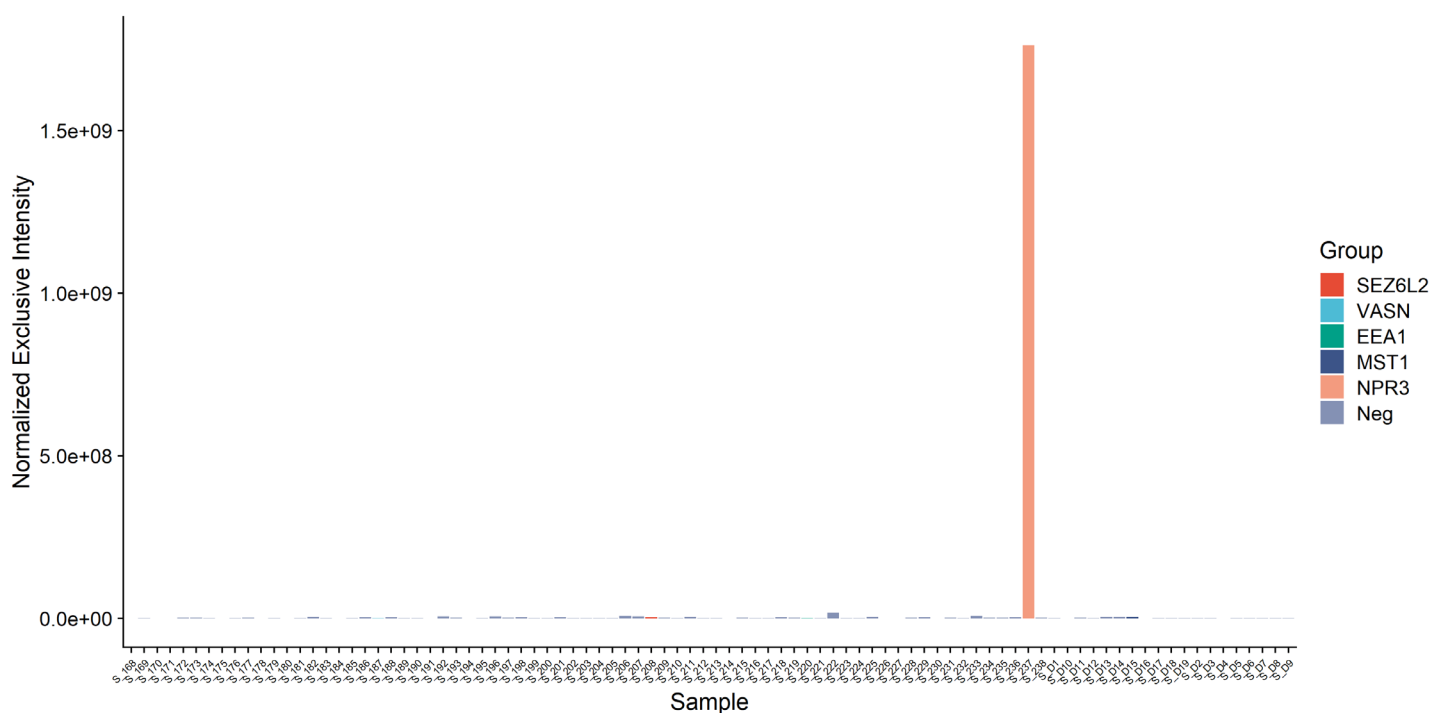

**B**

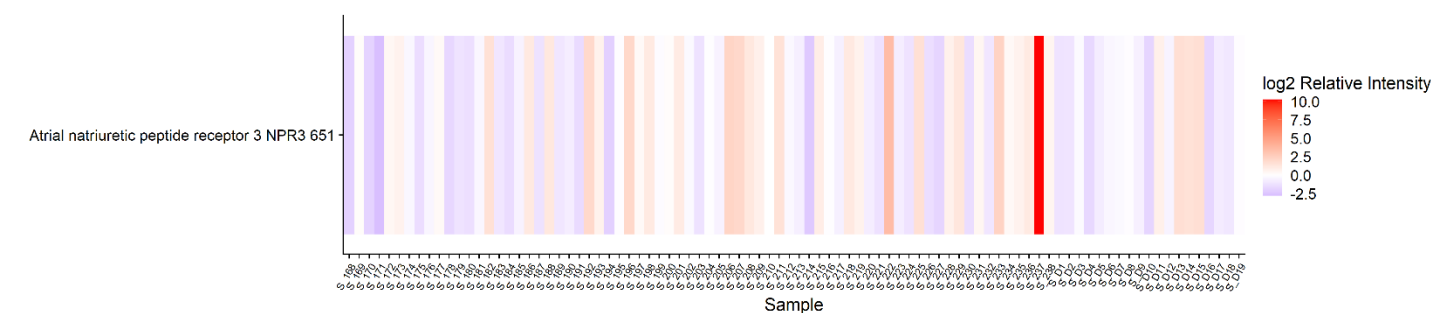

**C**

|                     |                     |                     |                     |     |
|---------------------|---------------------|---------------------|---------------------|-----|
| M P S L L V L T F S | P C V L L G W A L L | A G G T G G G G V G | G G G G G A G I G G | 40  |
| G R Q E R E A L P P | Q K I E V L V L L P | Q D D S Y L F S L T | R V R P A I E Y A L | 80  |
| R S V E G N G T G R | R L L P P G T R F Q | V A Y E D S D C G N | R A L F S L V D R V | 120 |
| A A A R G A K P D L | I L G P V C E Y A A | A P V A R L A S H W | D L P M L S A G A L | 160 |
| A A G F Q H K D S E | Y S H L T R V A P A | Y A K M G E M M L A | L F R H H H W S R A | 200 |
| A L V Y S D D K L E | R N C Y F T L E G V | H E V F Q E E G L H | T S I Y S F D E T K | 240 |
| D L D L E D I V R N | I Q A S E R V V I M | C A S S D T I R S I | M L V A H R H G M T | 280 |
| S G D Y A F F N I E | L F N S S S Y G D G | S W K R G D K H D F | E A K Q A Y S S L Q | 320 |
| T V T L L R T V K P | E F E K F S M E V K | S S V E K Q G L N M | E D Y V N M F V E G | 360 |
| F H D A I L L Y V L | A L H E V L R A G Y | S K K D G G K I I Q | Q T W N R T F E G I | 400 |
| A G Q V S I D A N G | D R Y G D F S V I A | M T D V E A G T Q E | V I G D Y F G K E G | 440 |
| R F E M R P N V K Y | P W G P L K L R I D | E N R I V E H T N S | S P C K S S G G L E | 480 |
| E S A V T G I V V G | A L L G A G L L M A | F Y F F R K K Y R I | T I E R R T Q Q E E | 520 |
| S N L G K H R E L R | E D S I R S H F S V | A                   |                     |     |

# Supplemental Figure 6. FCN3 mass spectrometry data

**A**

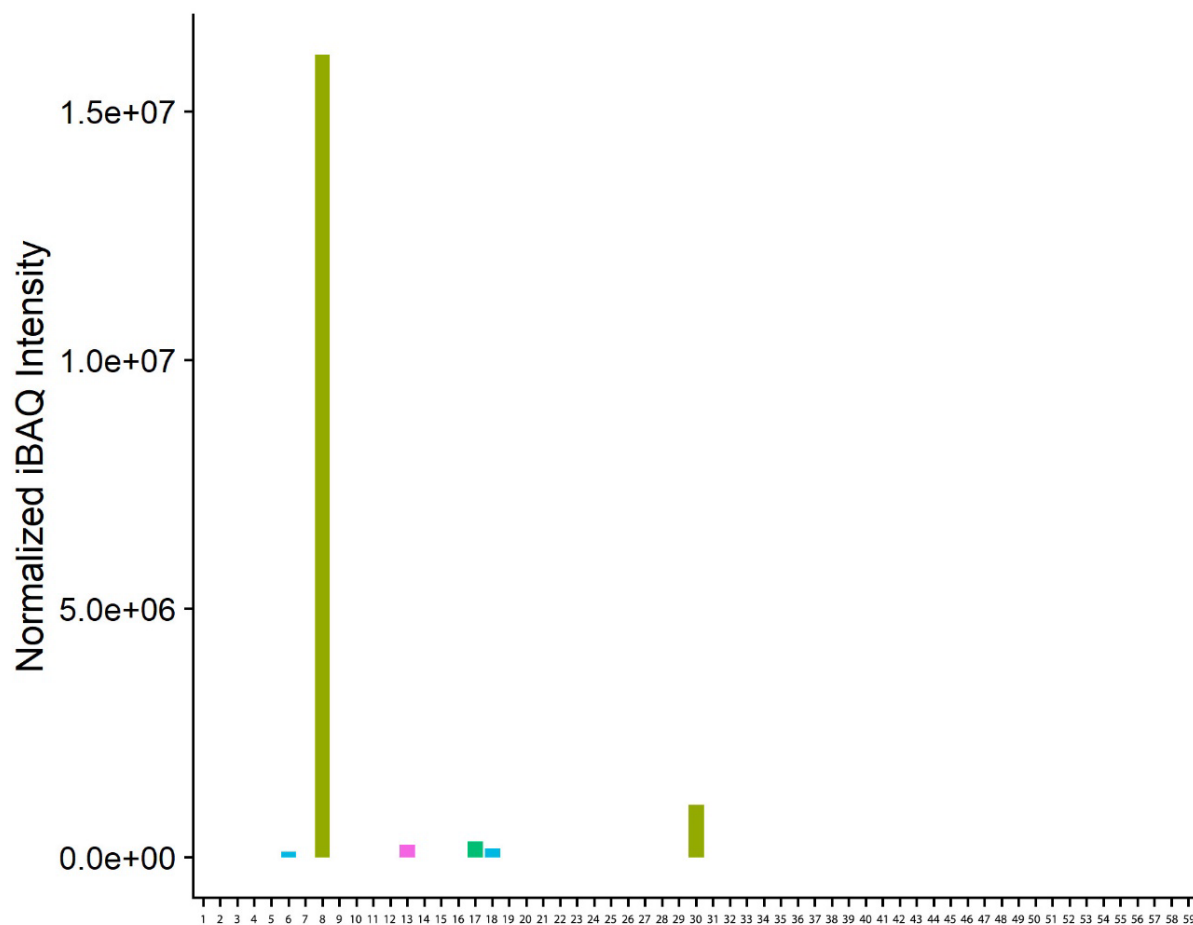

**B**

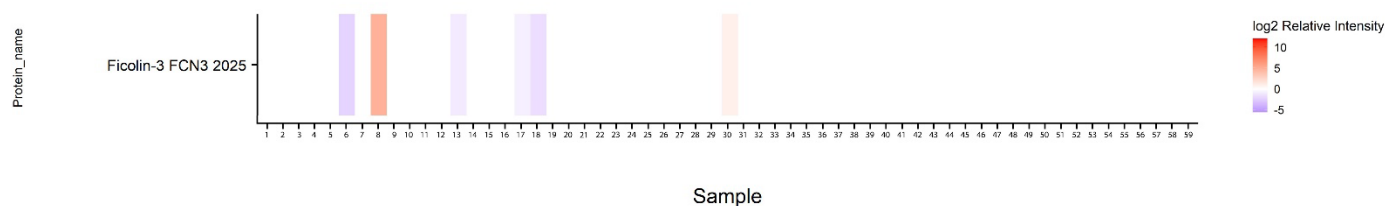

**C**

**O75636, 32,903.3 Da**

**Ficolin-3 OS=Homo sapiens OX=9606 GN=FCN3 PE=1 SV=2**

**7 exclusive unique peptides, 10 exclusive unique spectra, 14 total spectra, 86/299 amino acids (29% coverage)**

|             |             |             |               |
|-------------|-------------|-------------|---------------|
| MDLLWILPSL  | WLLLLGGPAC  | LKTQEHPSCP  | GPRELEASEASKV |
| VNLLRCQEGP  | RNCRELLSQG  | ATLSGWYHLC  | LPEGRALPVF    |
| FWLGNENLHQ  | LTLLQGNWELR | VELEDFNGNR  | TFAHYATFRL    |
| SNSNC AVIVH | GAWWYASCYR  | SNLNGRYAVS  | EAAAHKYGID    |
| VLLPSCPGAP  | GSPGEK GAPG | PQGPPGPPGK  | MGPKGEPGDP    |
| CDMDTEGGGW  | LVFQRRQDGS  | VDFFRSWSSY  | RAGFGNQESE    |
| LGEVDHYQLA  | LGKFSEGTAG  | DSL SLHSGRP | FTTYDADHDS    |
| WASGRGVGHP  | YRRVRMMLR   |             |               |

# Supplemental Figure 7. CD206 mass spectrometry data

**A**

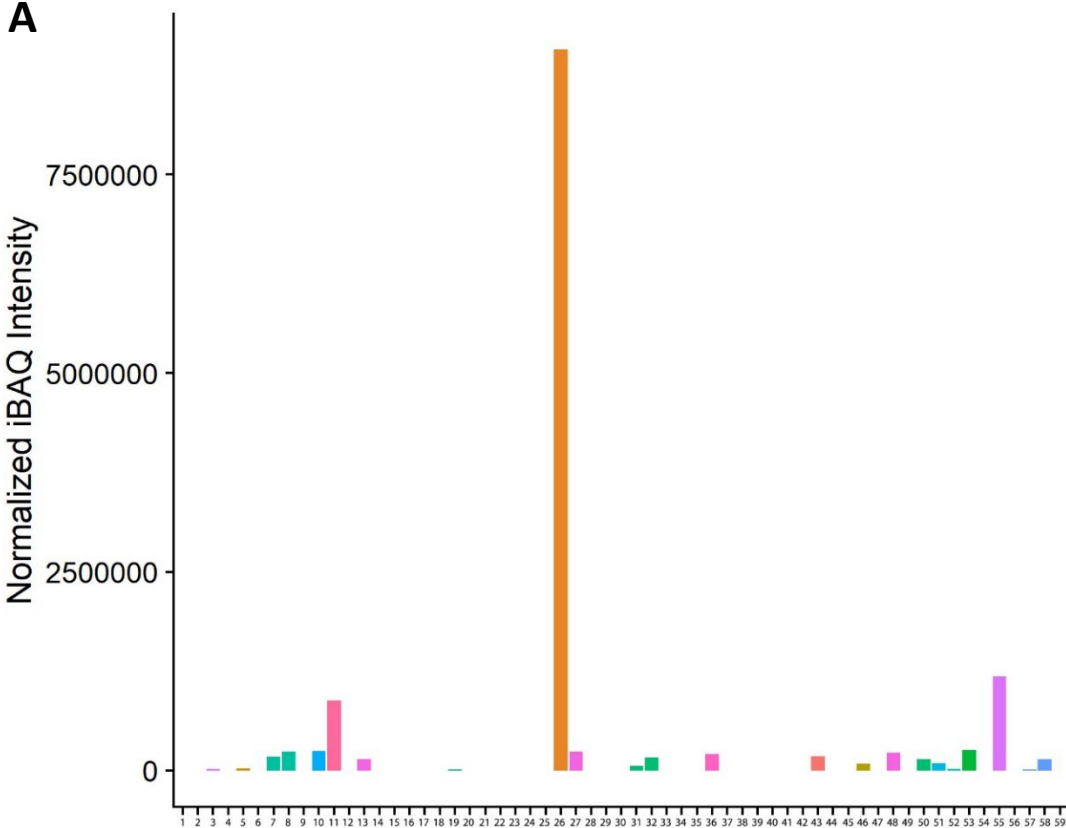

**B**

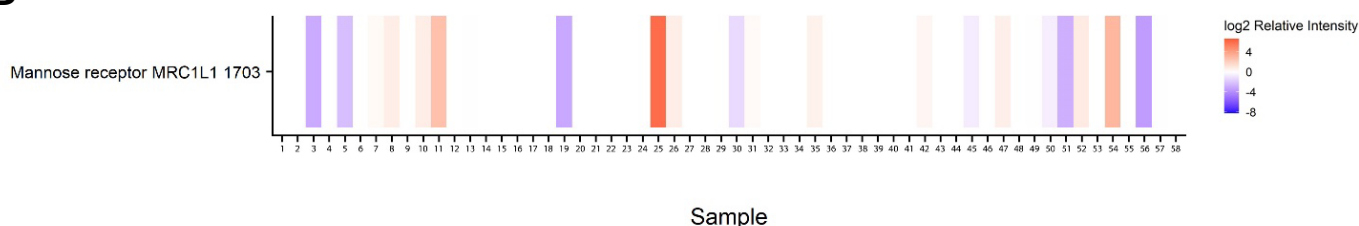

**C**

P22897, 166,014.7 Da

Macrophage mannose receptor 1 OS=Homo sapiens OX=9606 GN=MRC1 PE=1 SV=1

26 exclusive unique peptides, 30 exclusive unique spectra, 33 total spectra, 340/1456 amino acids (23% coverage)

|             |            |            |            |
|-------------|------------|------------|------------|
| MRLPLLVLVFA | SVIPGAVLLL | DTRQFLIYNE | DHKRCVDAVS |
| TDWVAITLYA  | CDSKSEFQKW | ECKNDTLLGI | KGEDLFFNYG |
| GNANGATCAF  | PFKFENKWYA | DCTSAGRSDG | WLWCGTTTDY |
| HQARKSCQQQ  | NAELLSITEI | HEQTYLTGLT | SSLTSGLWIG |
| PGKNAKWENL  | ECVQKLGYIC | KKGNTTLNSF | VIPSESDVPT |
| IHTIEELDFI  | ISQLGYEPND | ELWIGLNDIK | IQMYFEWSDG |
| PLGYICKMKS  | RSQGPEIVEV | EKGCRKGWKK | HHFYCYMIGH |
| KYFWTGLSDI  | QTKGTFQWTI | EEEVRFTHWN | SDMPGRKPGC |
| TPEPKCPEDW  | GASSRTSLCF | KLYAKGKHEK | KTWFESRDFC |
| SPSEGFTWSD  | GSPVSYENWA | YGEPNNYQNV | EYCGELKGD  |
| EDGWVIYKDY  | QYYFSKEKET | MDNARAFCKR | NFGDLVSIQS |
| DYVSWATGEP  | NFANEDENCV | TMYSNSGFVN | DINCGYPNAF |
| GFMEEERKNW  | QEARKACIGF | GGNLVSIQNE | KEAGFLTYHM |
| RRSSLSEYEDA | DCVVIIGGAS | NEAGKWMDDT | CDSKRGYICQ |
| TYCKLHNSLI  | ASILDYPYSA | FAWLQMETSN | ERVWIALNSN |
| TAHCNESFYF  | LCKRSDEIPA | TEPPQLPGRC | PESDHTAWIP |
| FLSYRVEPLK  | SKTNFWIGLF | RNVEGTWLWI | NNSPVSFVNW |
| IDAKPHELL   | TTKADTRKMD | PSKPSNVAG  | VVIVILLIL  |
| MKDLVGNIEQ  | NEHSV I    |            |            |

|              |             |             |             |
|--------------|-------------|-------------|-------------|
| PSAVQTAACN   | QDAESQKFRW  | VSESQIMSVAV | FKLCLGVPSK  |
| NRQEKNIIMLY  | KGSGLWSRWK  | IYGTTDNLCS  | RGYEAMYTLL  |
| DTDKLFYCP    | LKFEGSESLW  | NKDPLTSVSY  | QINSKSAITW  |
| LNSLSFNSGW   | QWSDRSPFRY  | LNWLPGSPSA  | EPGKSCVSLN  |
| HCP SQW WPYA | GHCYKIHRDE  | KKIQRDALTT  | CRKEGGDLTS  |
| TPVTFTKWLR   | GEP SHENNRQ | EDCVVMKGD   | GYWADRGC EW |
| TLSTFAEANQ   | TCNNENAYLT  | TIEDRYEQAF  | LTSFVGLRPE  |
| VAMRTGIAGG   | LWDVLK CDEK | AKFVCKHWAE  | GVTHPPKPTT  |
| RALGGDLASI   | NNKEEQQT IW | RLITASGSYH  | KLFWLGLTYG  |
| TM SWNDINCE  | HLNNWICQIQ  | KGQTPKPEPT  | PAPQDNPPVT  |
| ESEKKFLWKY   | VNRNDAQSAY  | FIGLLISLDK  | KFAWMDGSKV  |
| ICQRHNS SIN  | ATTVMPTMPS  | VPSGCKEGWN  | FYSNKCFKIF  |
| KDSTFSAWTG   | LNDVNSEHTF  | LWTDGRGVHY  | TNWGKGYPGG  |
| TRSDPSLTNP   | PATIQRTDGFV | KYGKSSYSLM  | RQK FQWHEAE |
| LTDNQYTWD    | KWRVRYTNWA  | ADEPKLKSAC  | VYLDLDGYWK  |
| FHGHCY YIES  | SYTRNWGOAS  | LECLRMGSSL  | VSIESA AESS |
| NTGDP SGERN  | DCVALHASSG  | FWSNIHCSSY  | KGYICKRPKI  |
| TGAGLAAYFF   | YKKRRVHLPQ  | EGAFENTLYF  | NSQSSPGTSD  |



Supplemental Figure 8.

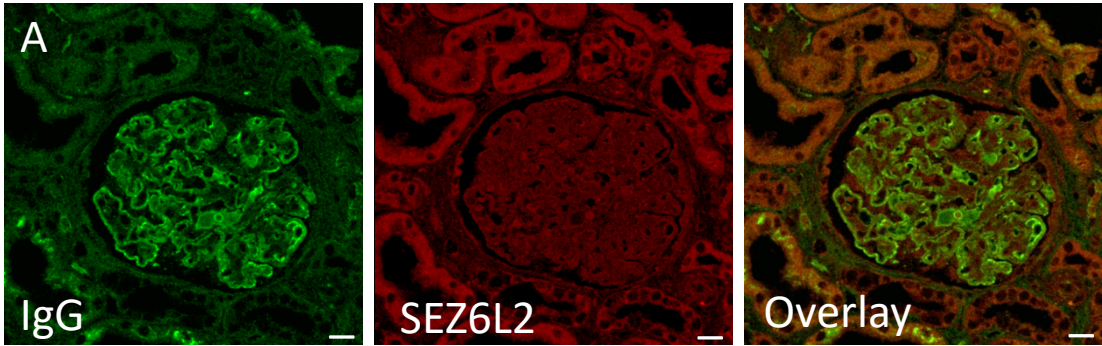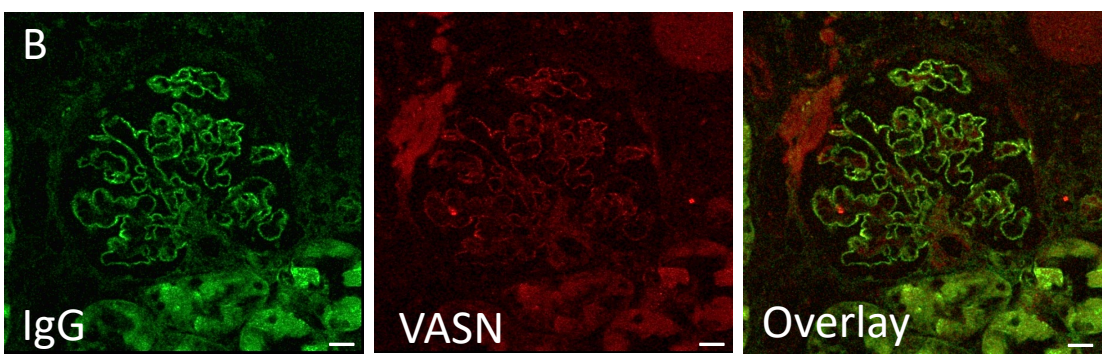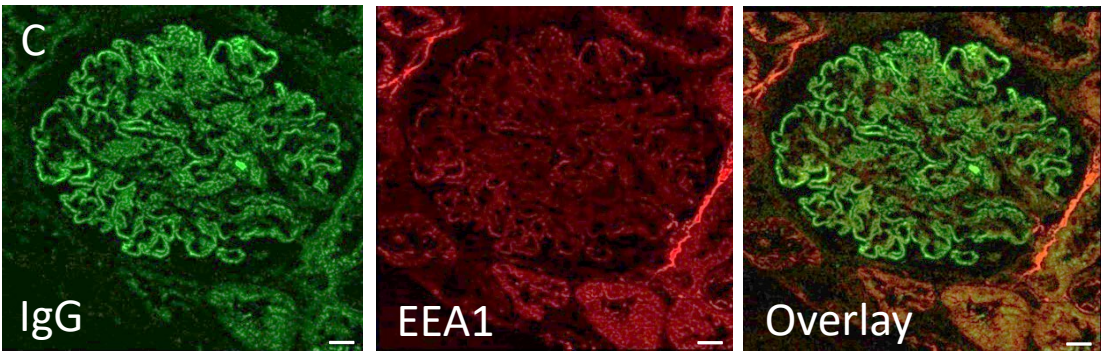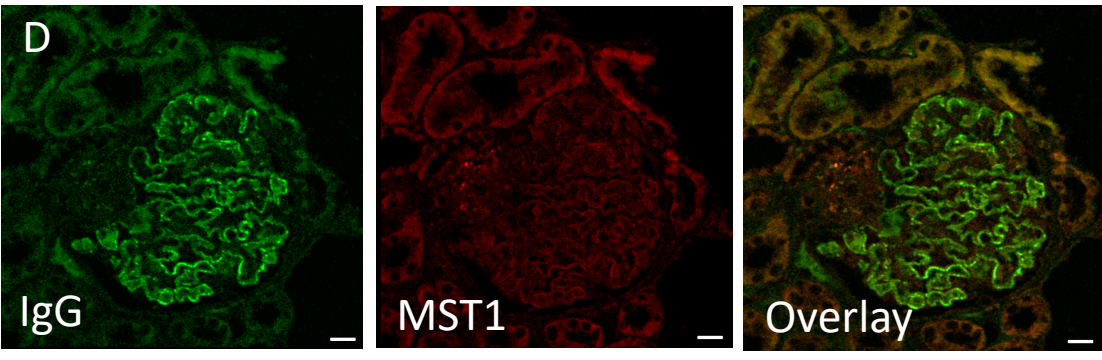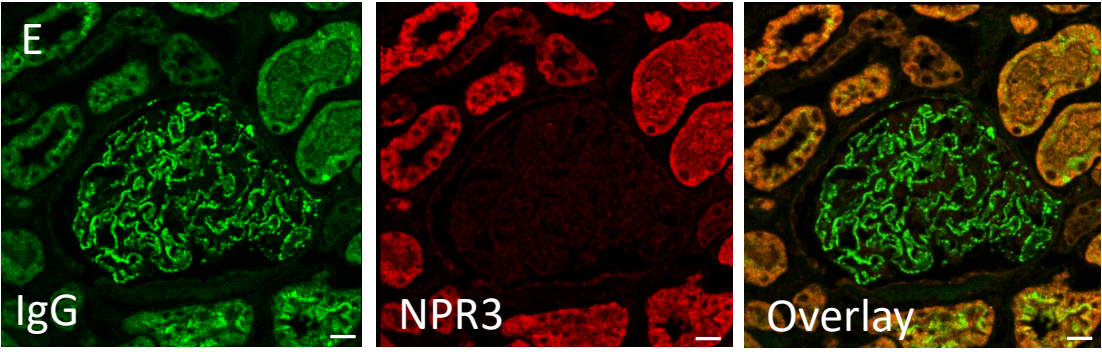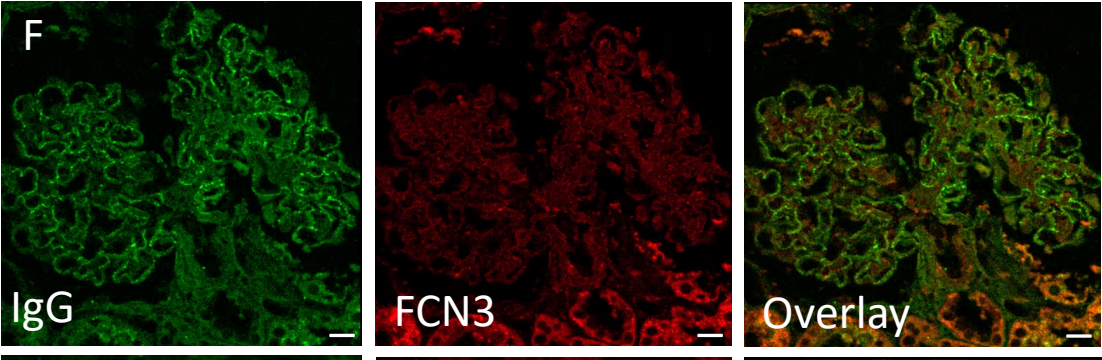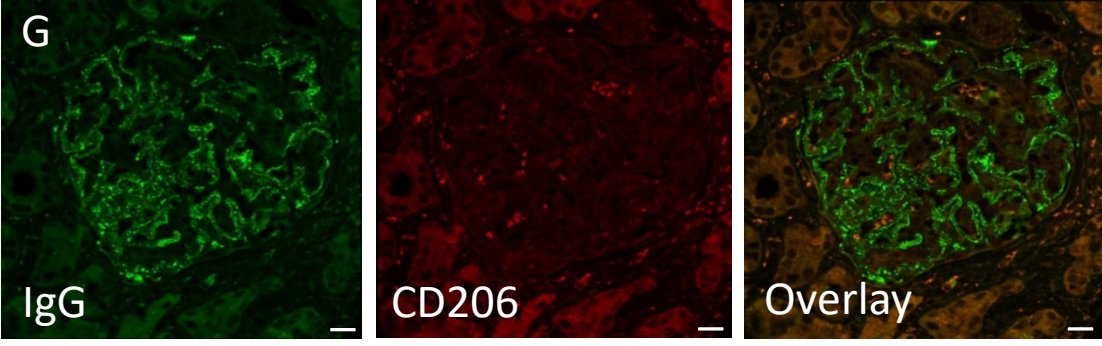



**Supplemental Figure 9.** Paraffin immunofluorescence staining of PLA2R, THSD7A, EXT1/2, NELL1, and diabetic nephropathy biopsies as negative controls for each candidate antigen. **A) SEZ6L2**; B) VASN; C) EEA1; D) MST1; E) NPR3; F) FCN3; G) CD206. Scale bar = 20  $\mu$ m.

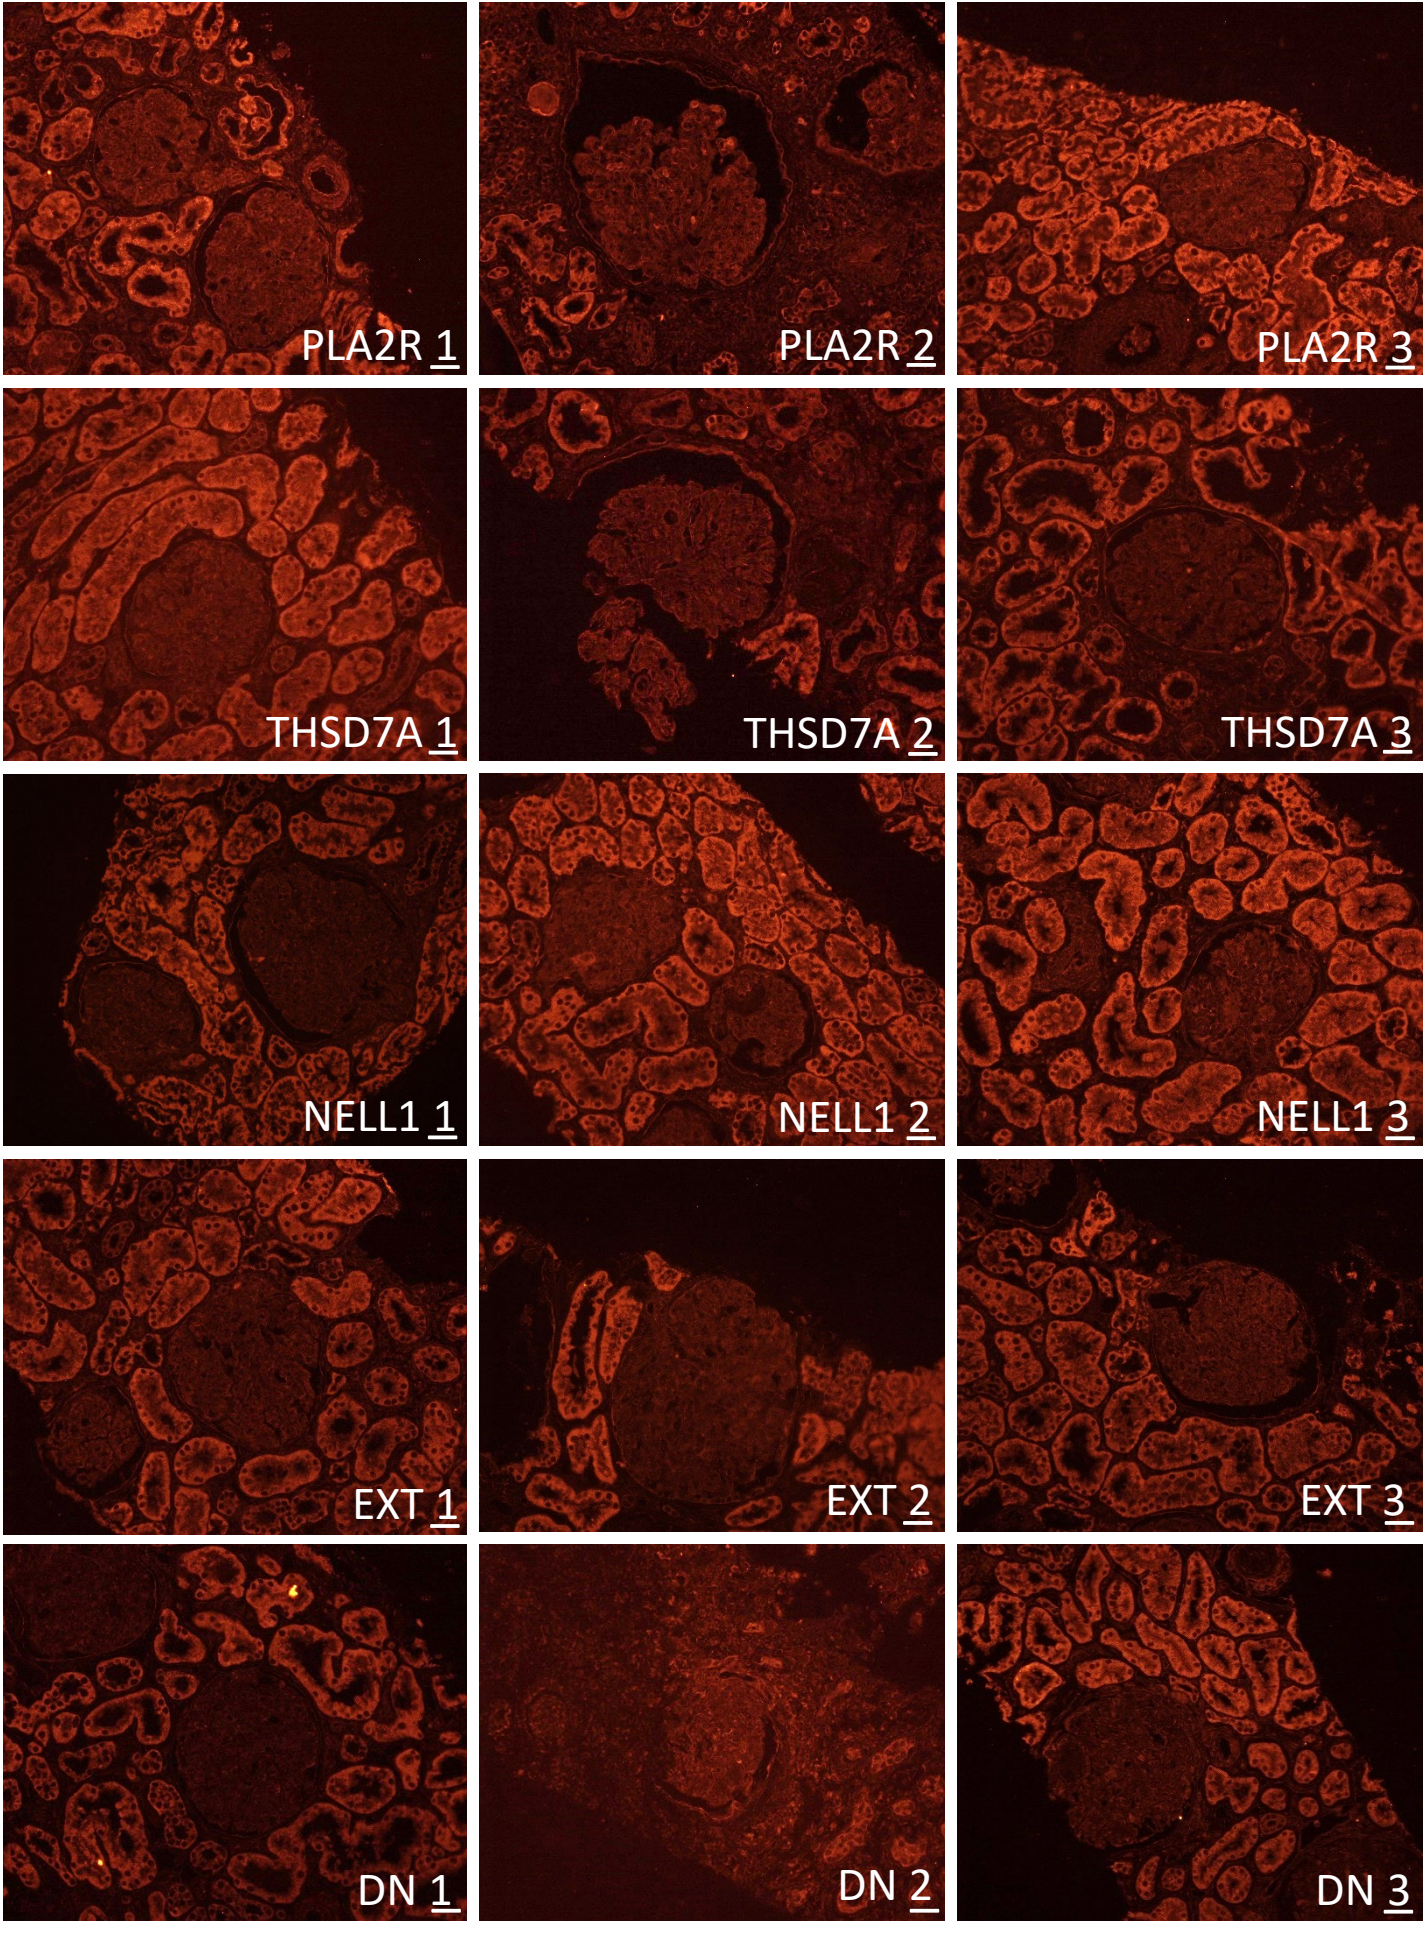

Negative controls for SEZ6L2 immunofluorescence staining



**Supplemental Figure 9.** Paraffin immunofluorescence staining of PLA2R, THSD7A, EXT1/2, NELL1, and diabetic nephropathy biopsies as negative controls for each candidate antigen. A) SEZ6L2; **B) VASN**; C) EEA1; D) MST1; E) NPR3; F) FCN3; G) CD206. Scale bar = 20  $\mu$ m.

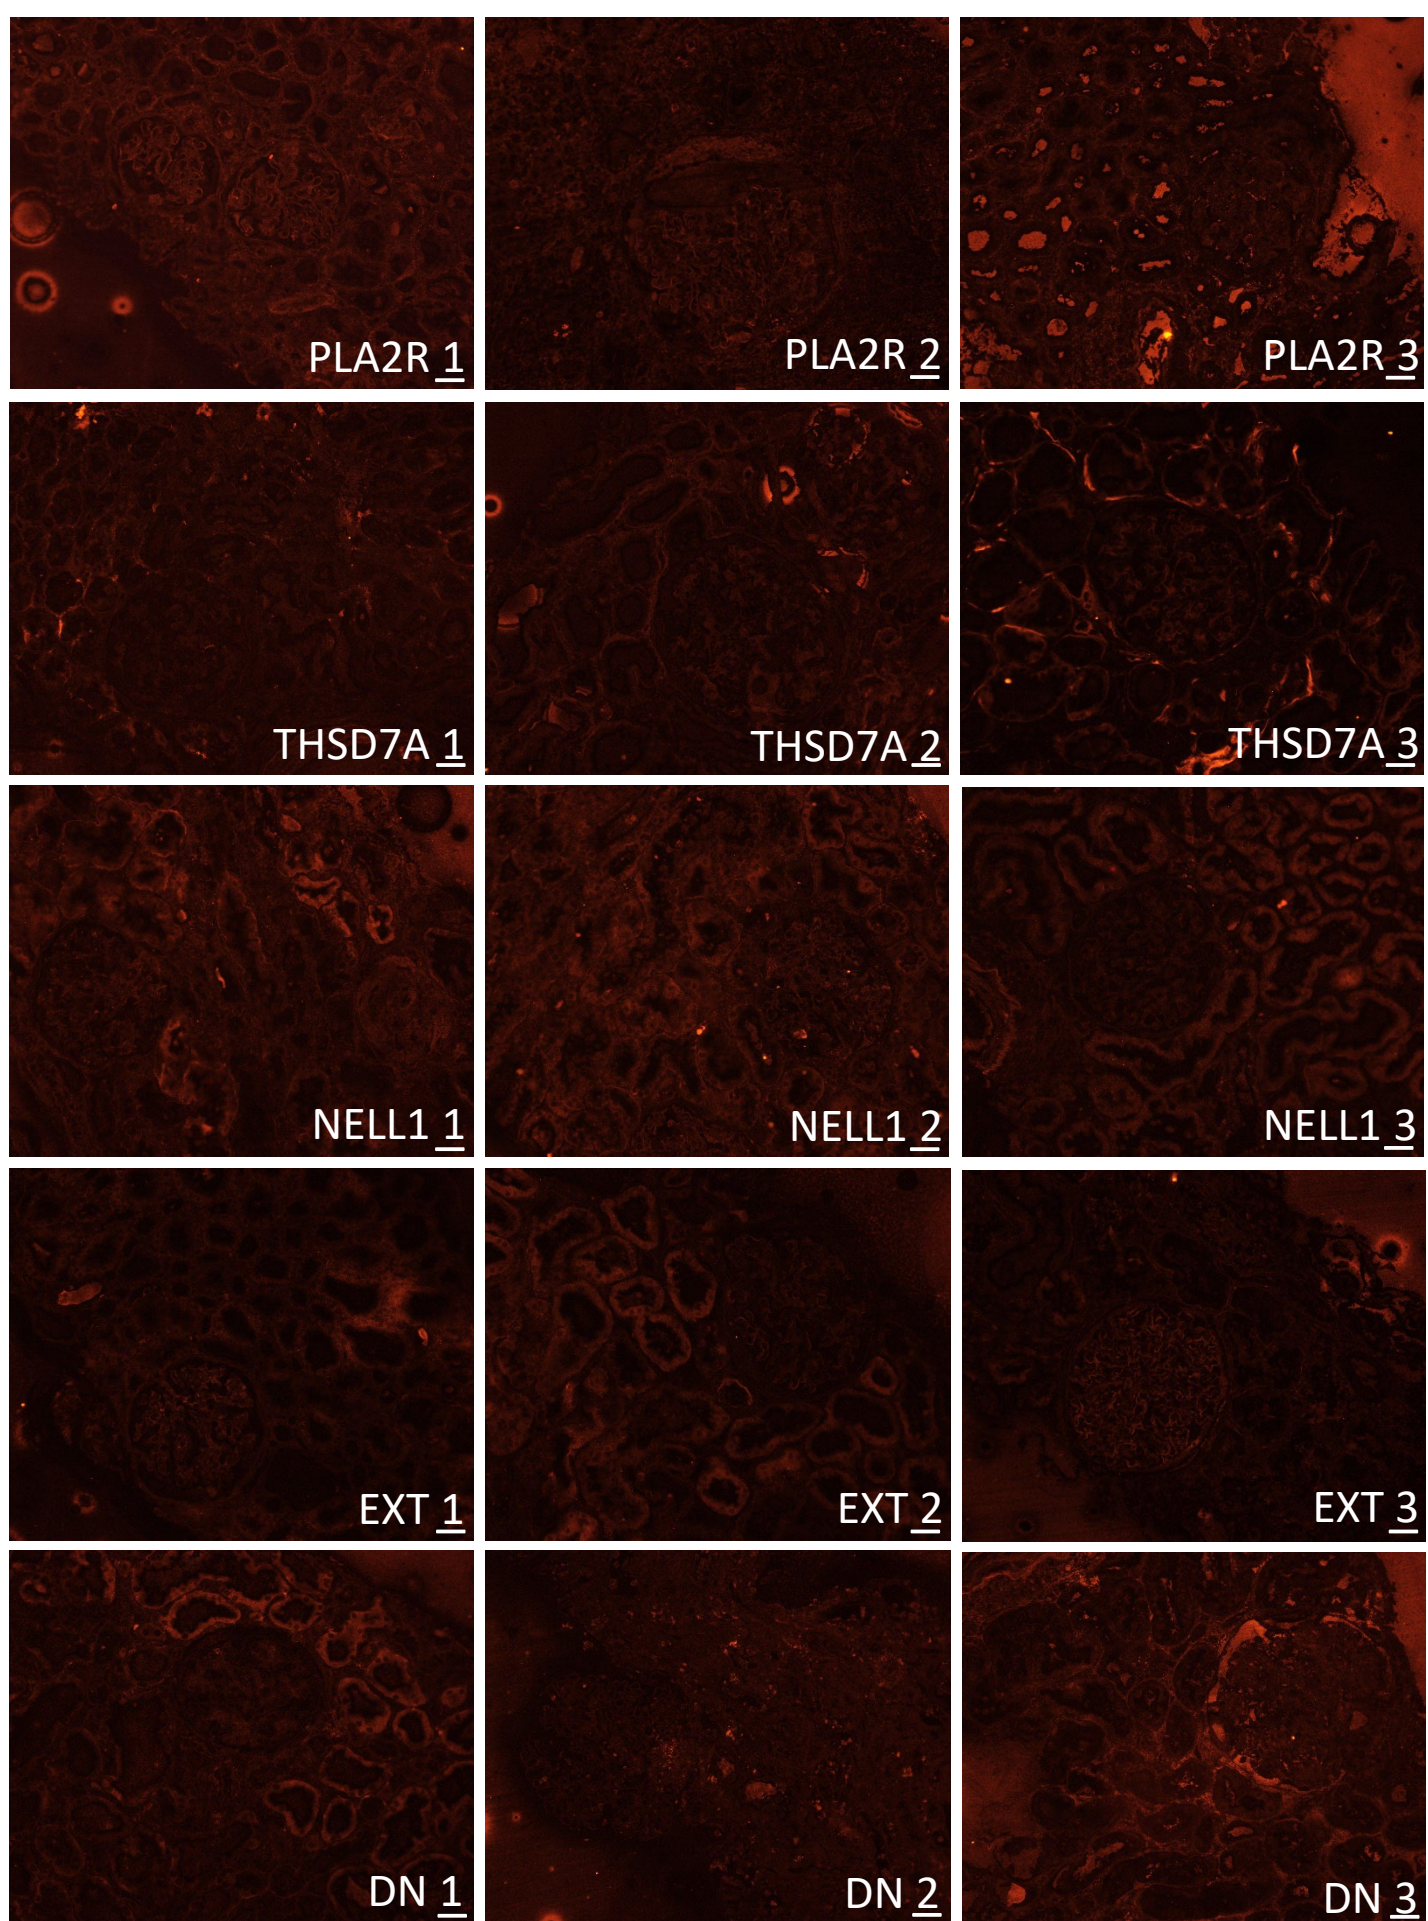

Negative controls for VASN immunofluorescence staining



**Supplemental Figure 9.** Paraffin immunofluorescence staining of PLA2R, THSD7A, EXT1/2, NELL1, and diabetic nephropathy biopsies as negative controls for each candidate antigen. A) SEZ6L2; B) VASN; **C) EEA1**; D) MST1; E) NPR3; F) FCN3; G) CD206. Scale bar = 20  $\mu\text{m}$ .

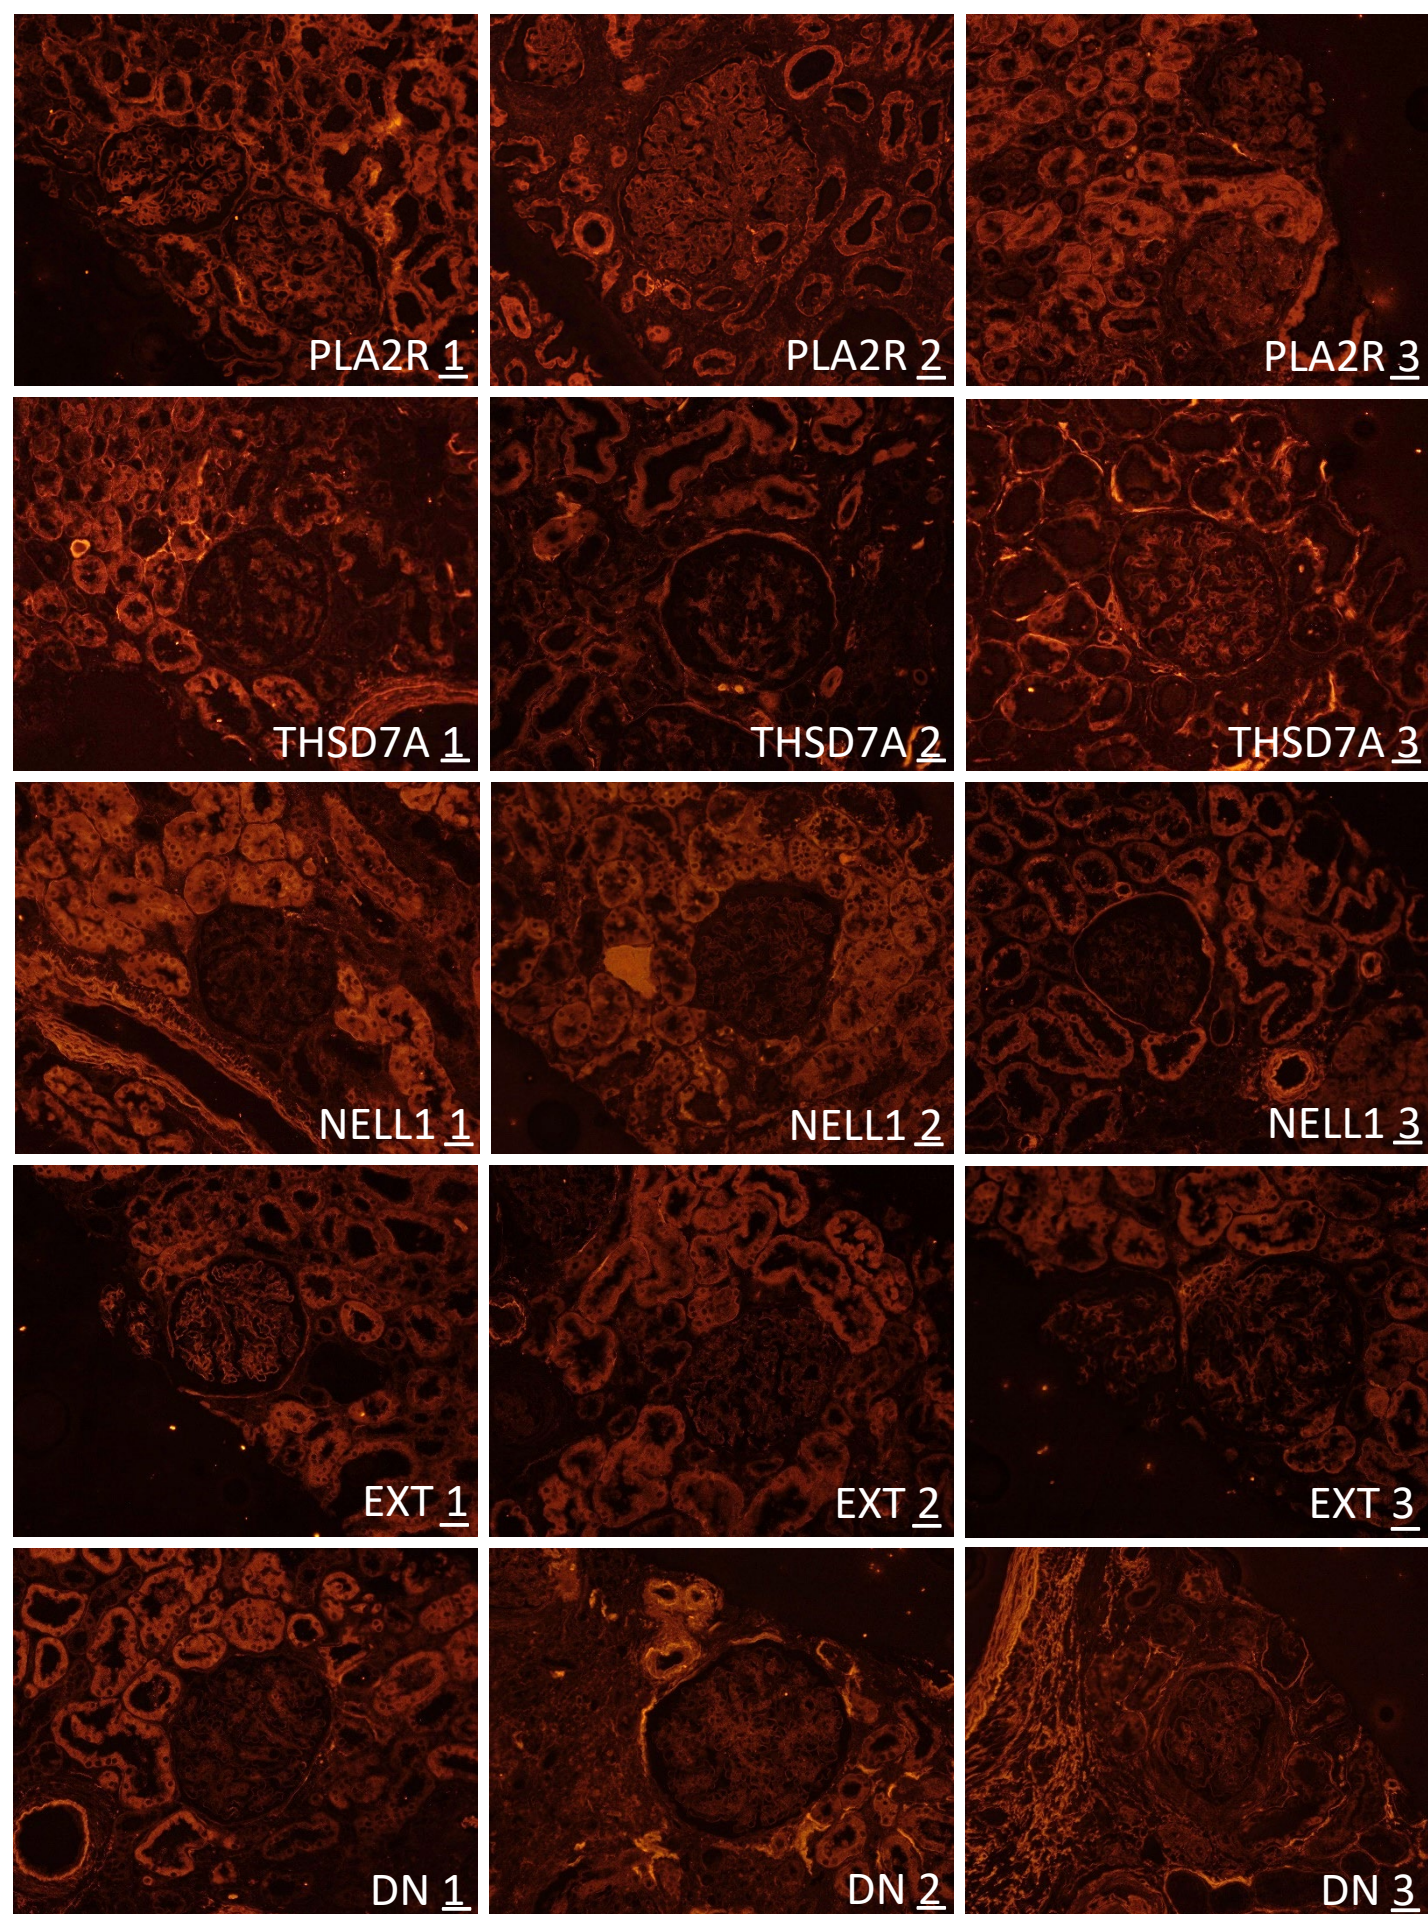

Negative controls for EEA1 immunofluorescence staining



**Supplemental Figure 9.** Paraffin immunofluorescence staining of PLA2R, THSD7A, EXT1/2, NELL1, and diabetic nephropathy biopsies as negative controls for each candidate antigen. A) SEZ6L2; B) VASN; C) EEA1; **D) MST1**; E) NPR3; F) FCN3; G) CD206. Scale bar = 20  $\mu$ m.

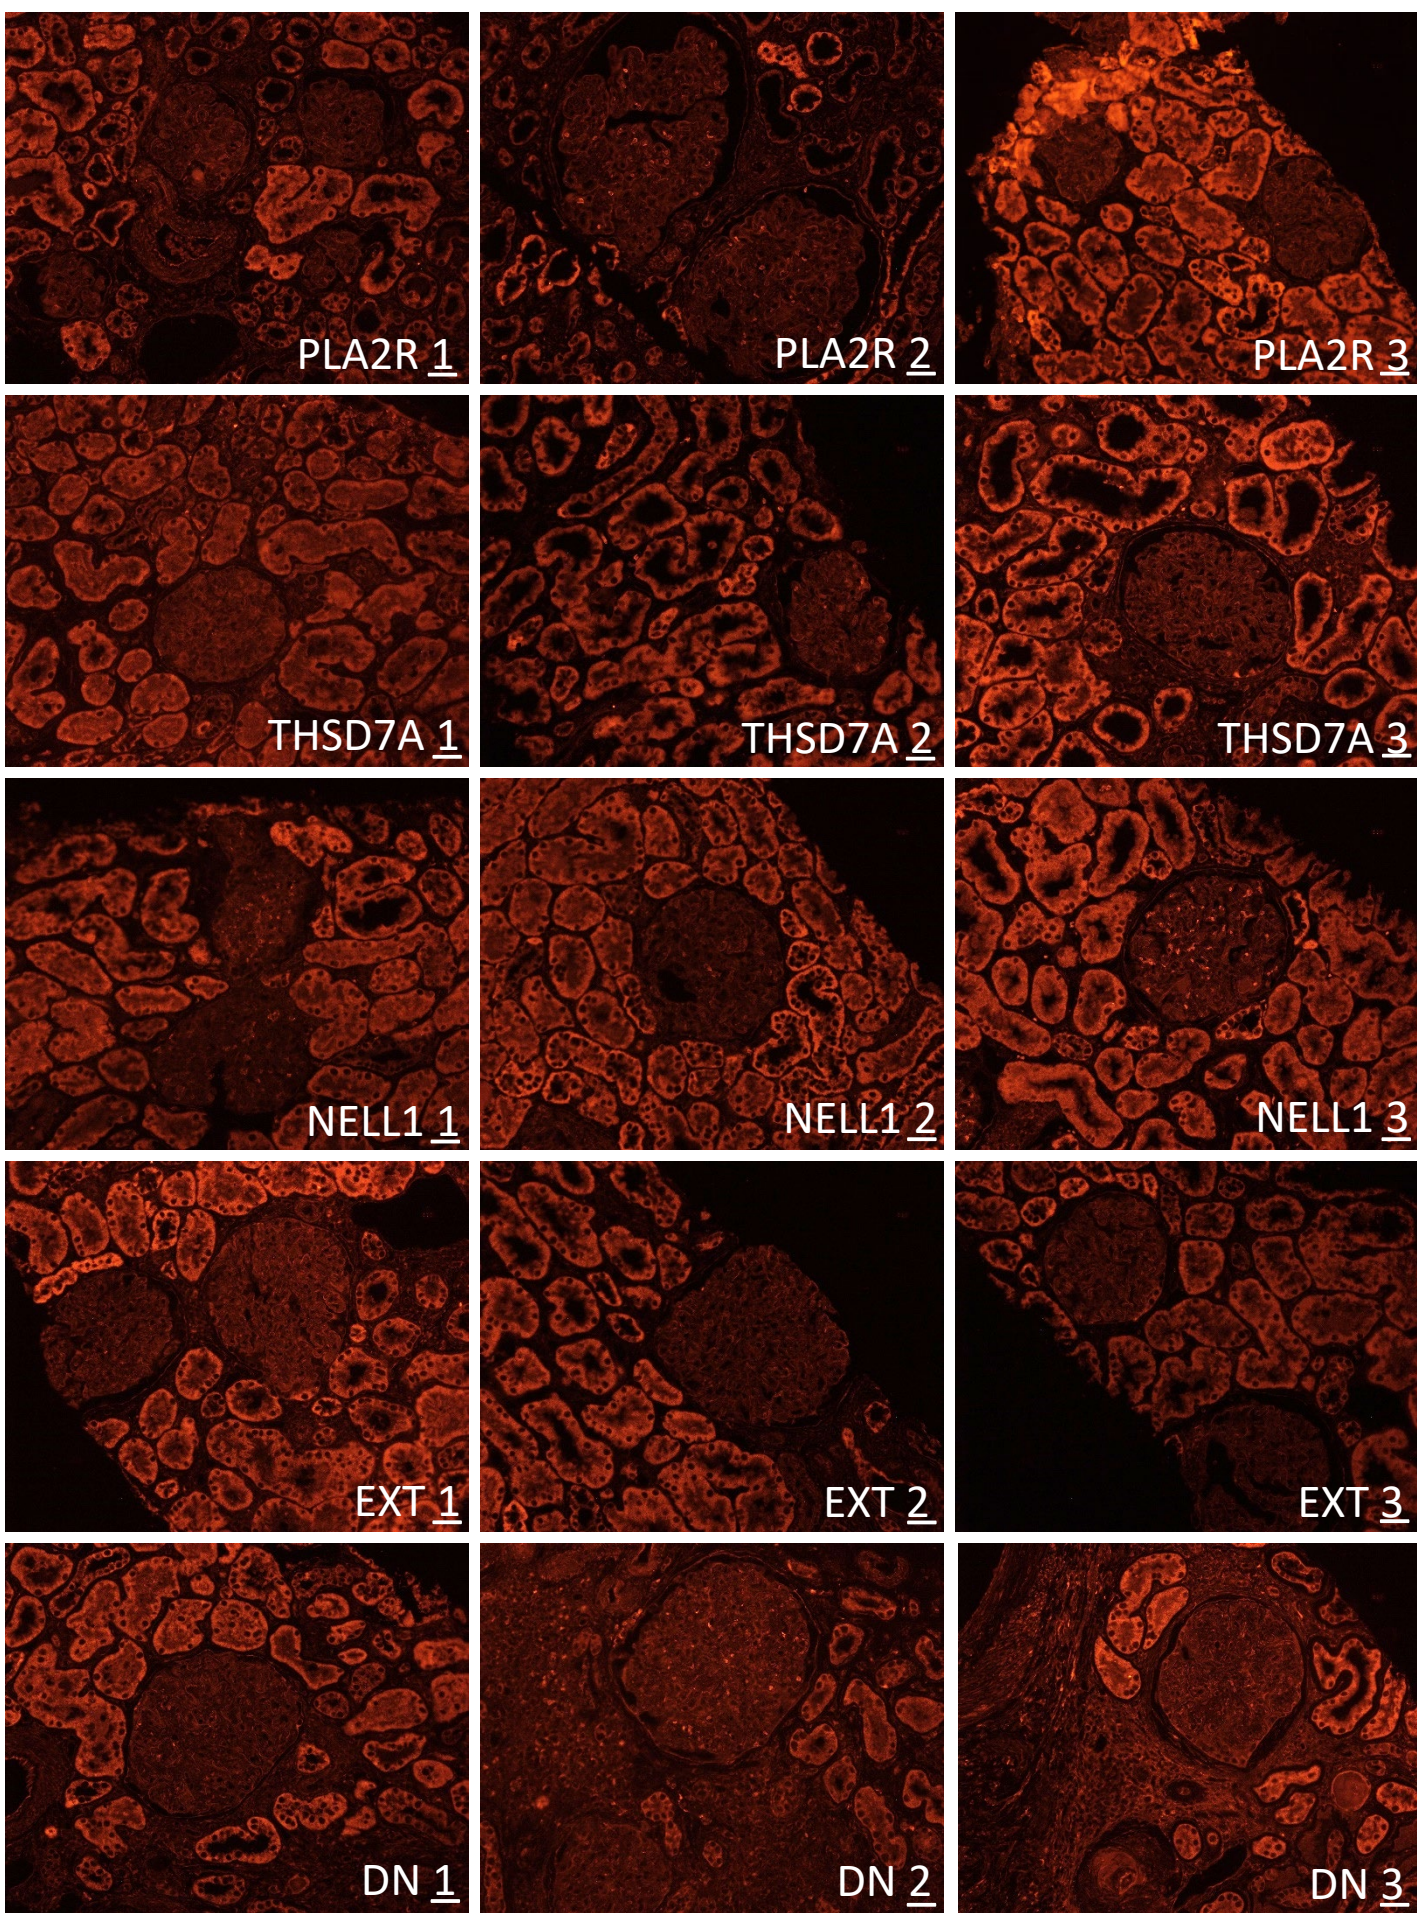

Negative controls for MST1 immunofluorescence staining



**Supplemental Figure 9.** Paraffin immunofluorescence staining of PLA2R, THSD7A, EXT1/2, NELL1, and diabetic nephropathy biopsies as negative controls for each candidate antigen. A) SEZ6L2; B) VASN; C) EEA1; D) MST1; **E) NPR3**; F) FCN3; G) CD206. Scale bar = 20  $\mu$ m.

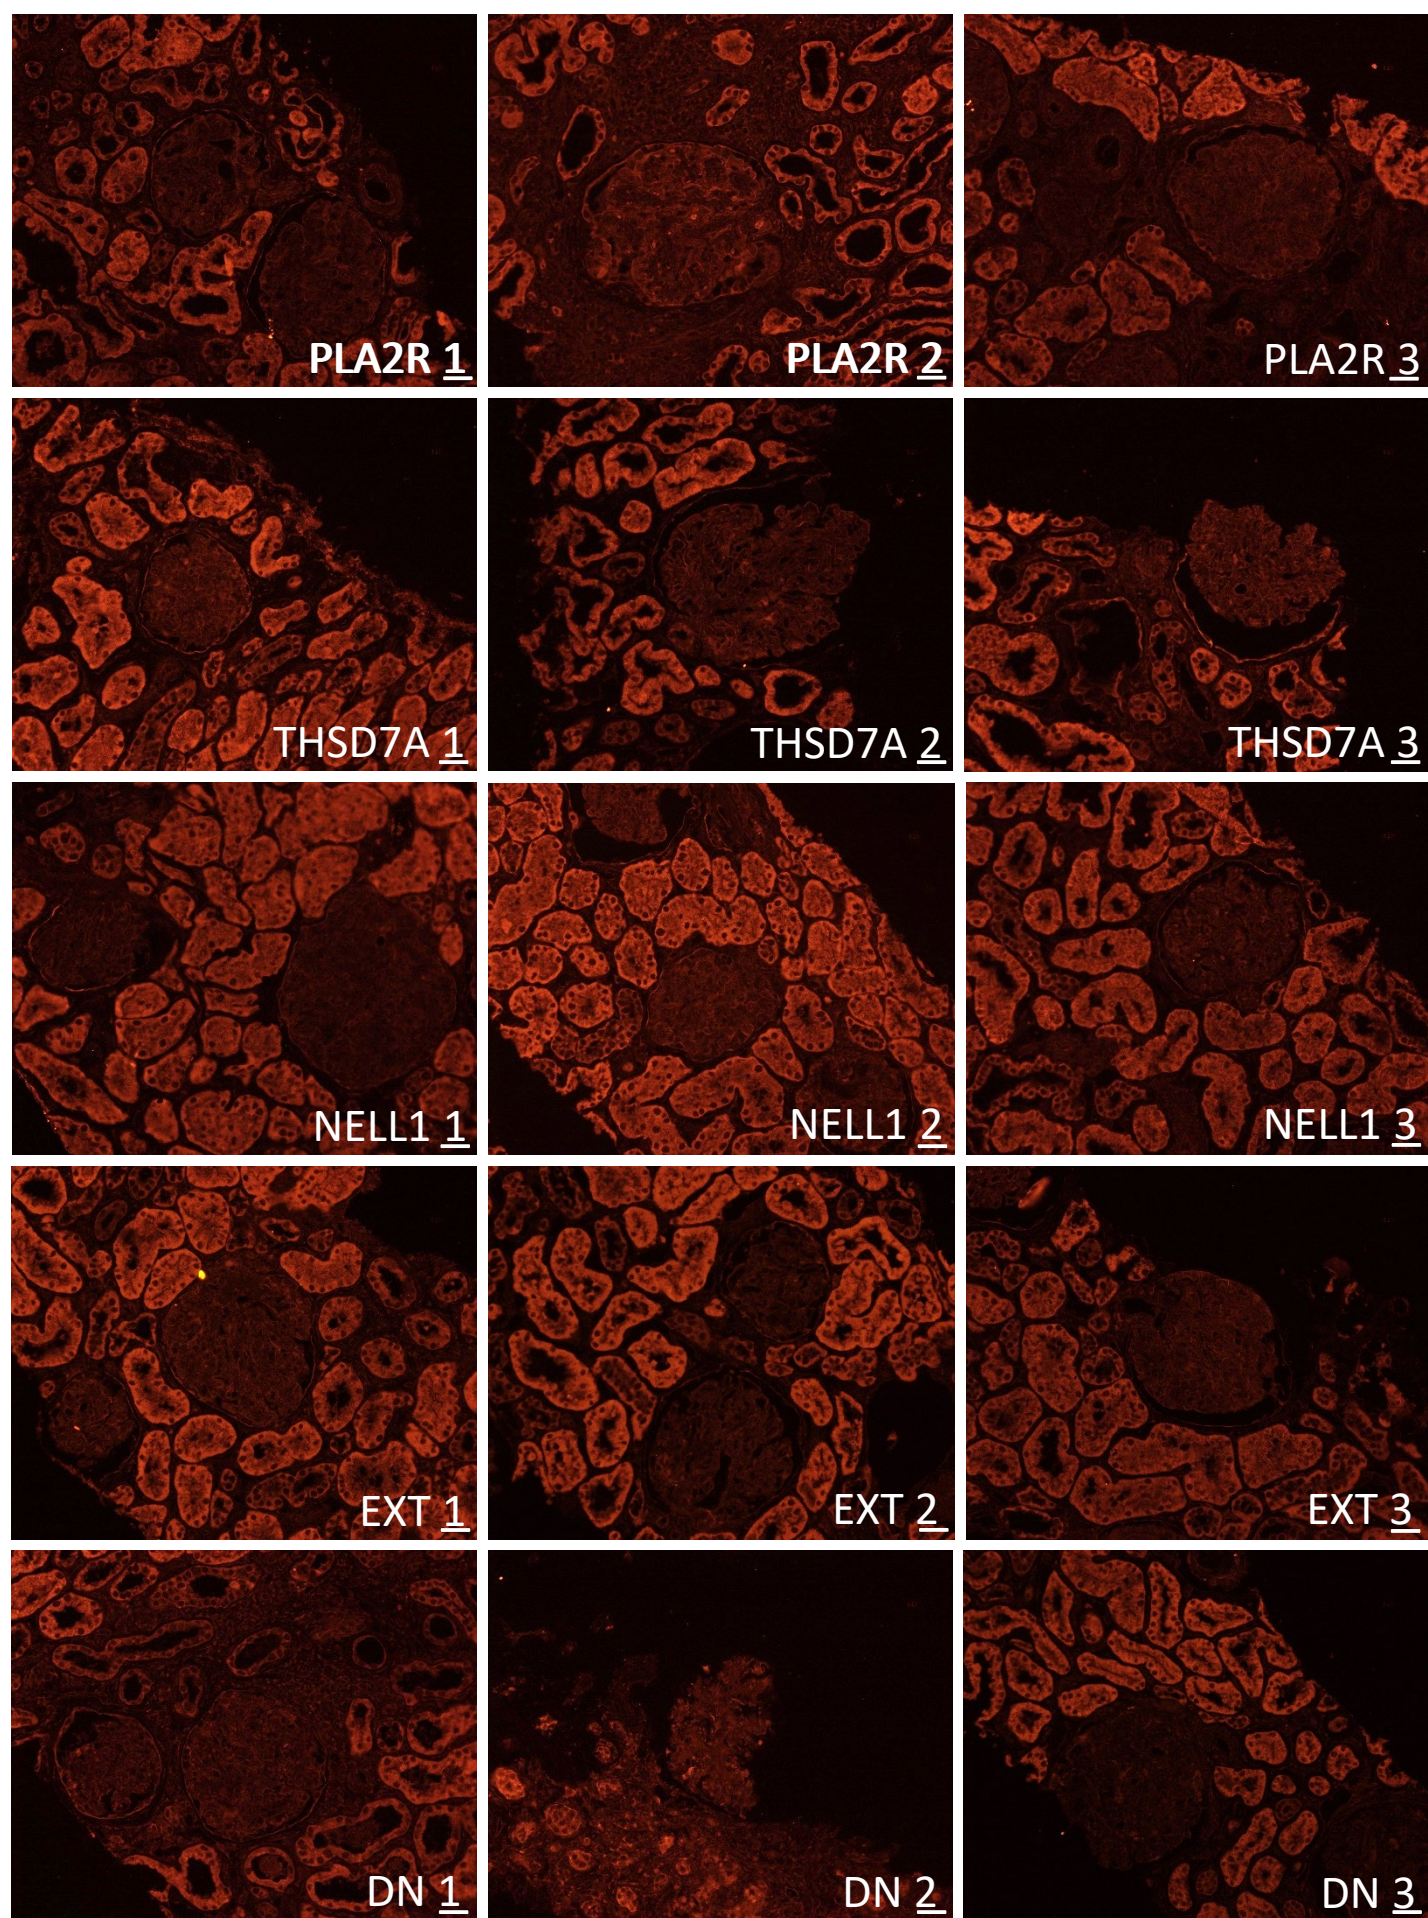

Negative controls for NPR3 immunofluorescence staining



**Supplemental Figure 9.** Paraffin immunofluorescence staining of PLA2R, THSD7A, EXT1/2, NELL1, and diabetic nephropathy biopsies as negative controls for each candidate antigen. A) SEZ6L2; B) VASN; C) EEA1; D) MST1; E) NPR3; **F) FCN3**; G) CD206. Scale bar = 20  $\mu$ m.

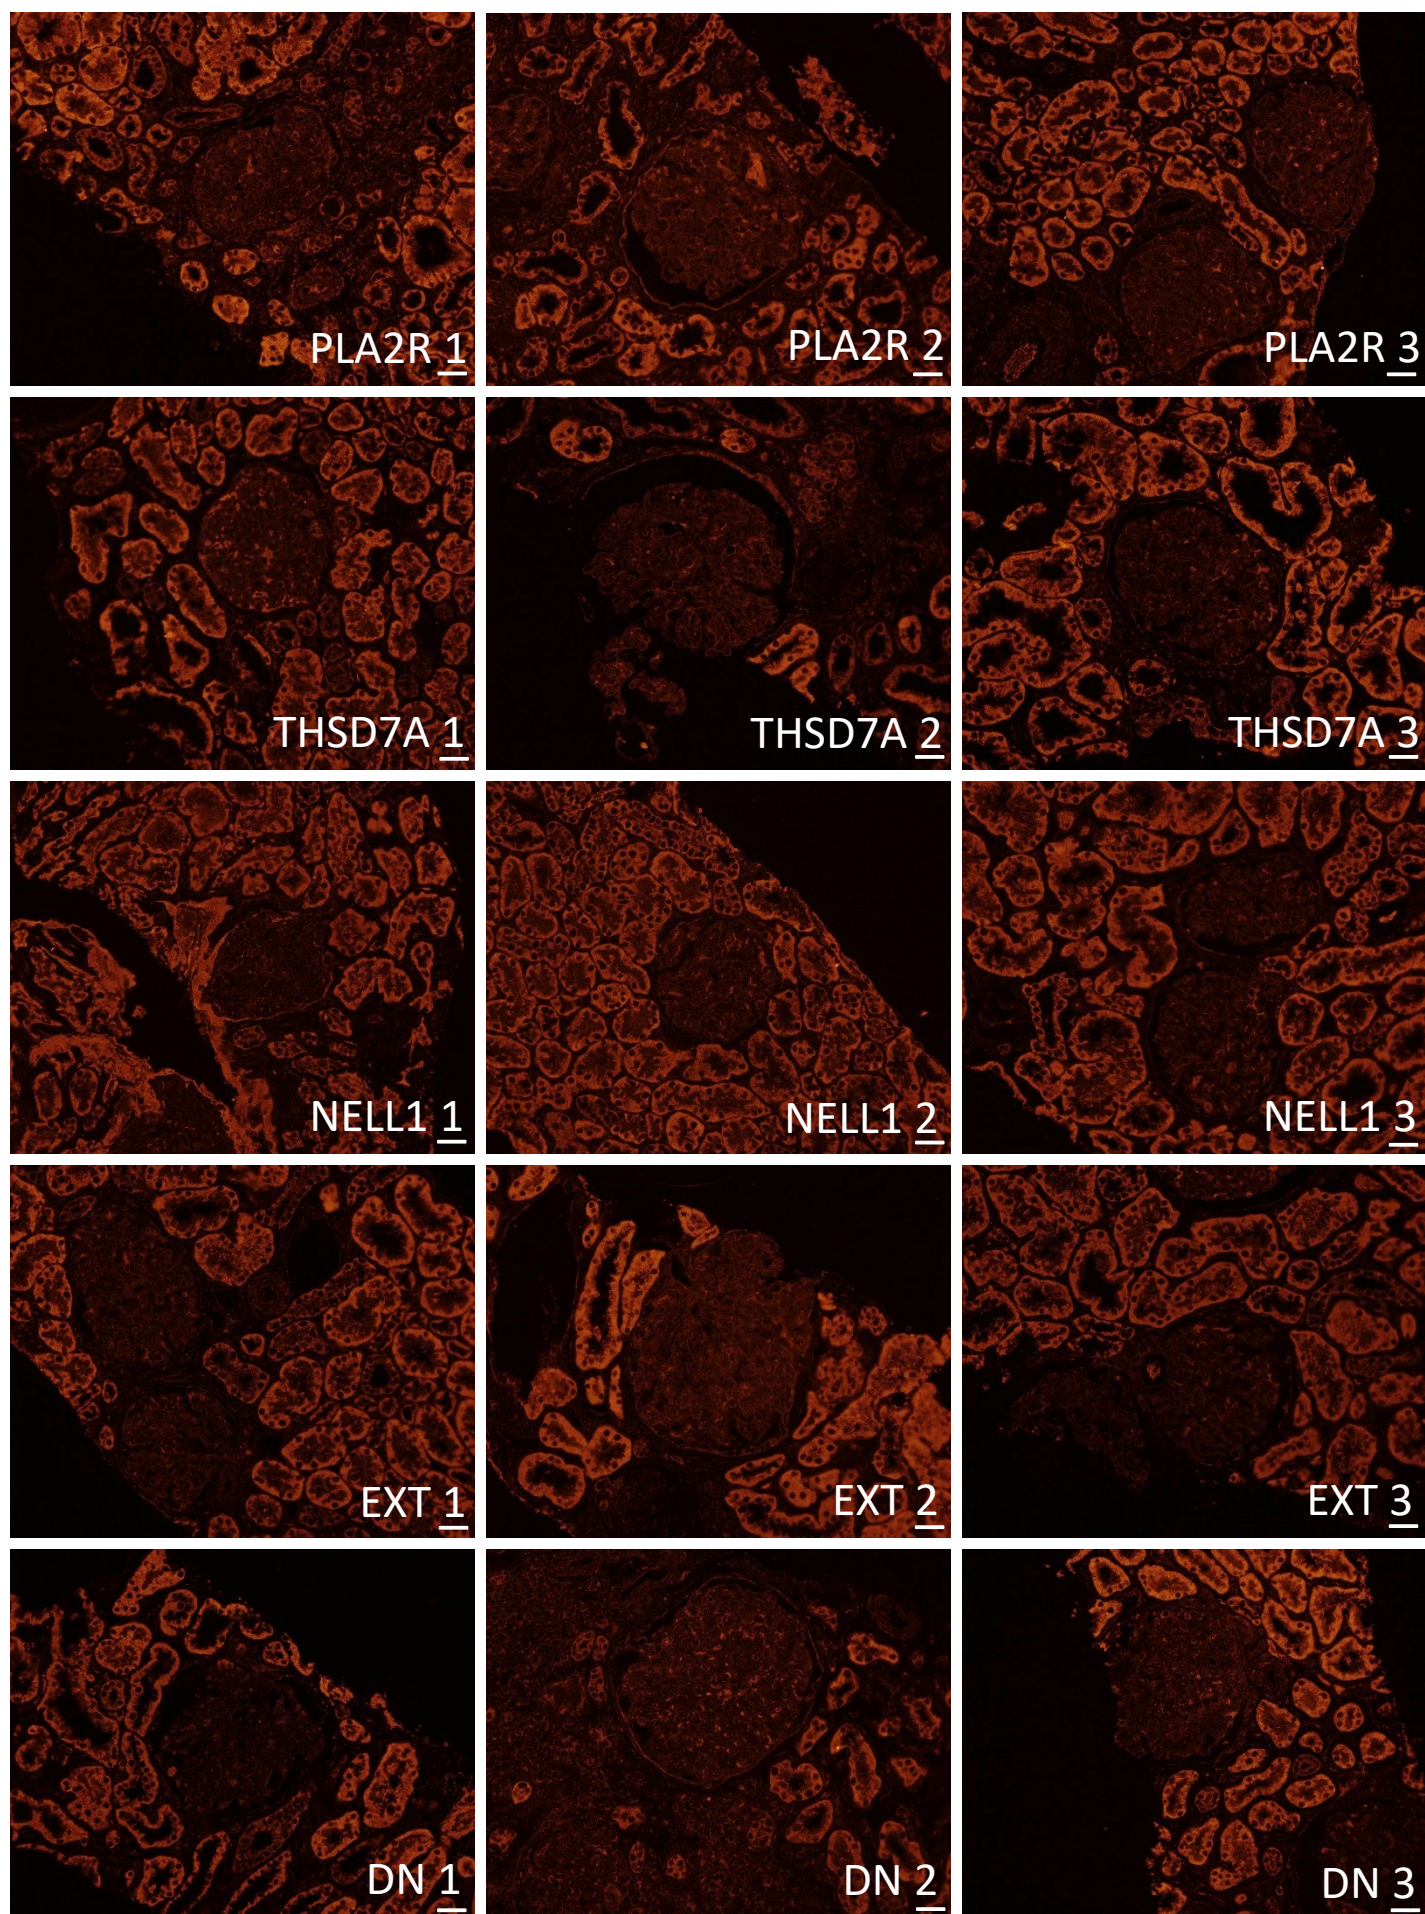

Negative controls for FCN3 immunofluorescence staining



**Supplemental Figure 9.** Paraffin immunofluorescence staining of PLA2R, THSD7A, EXT1/2, NELL1, and diabetic nephropathy biopsies as negative controls for each candidate antigen. A) SEZ6L2; B) VASN; C) EEA1; D) MST1; E) NPR3; F) FCN3; **G) CD206**. Scale bar = 20  $\mu\text{m}$ .

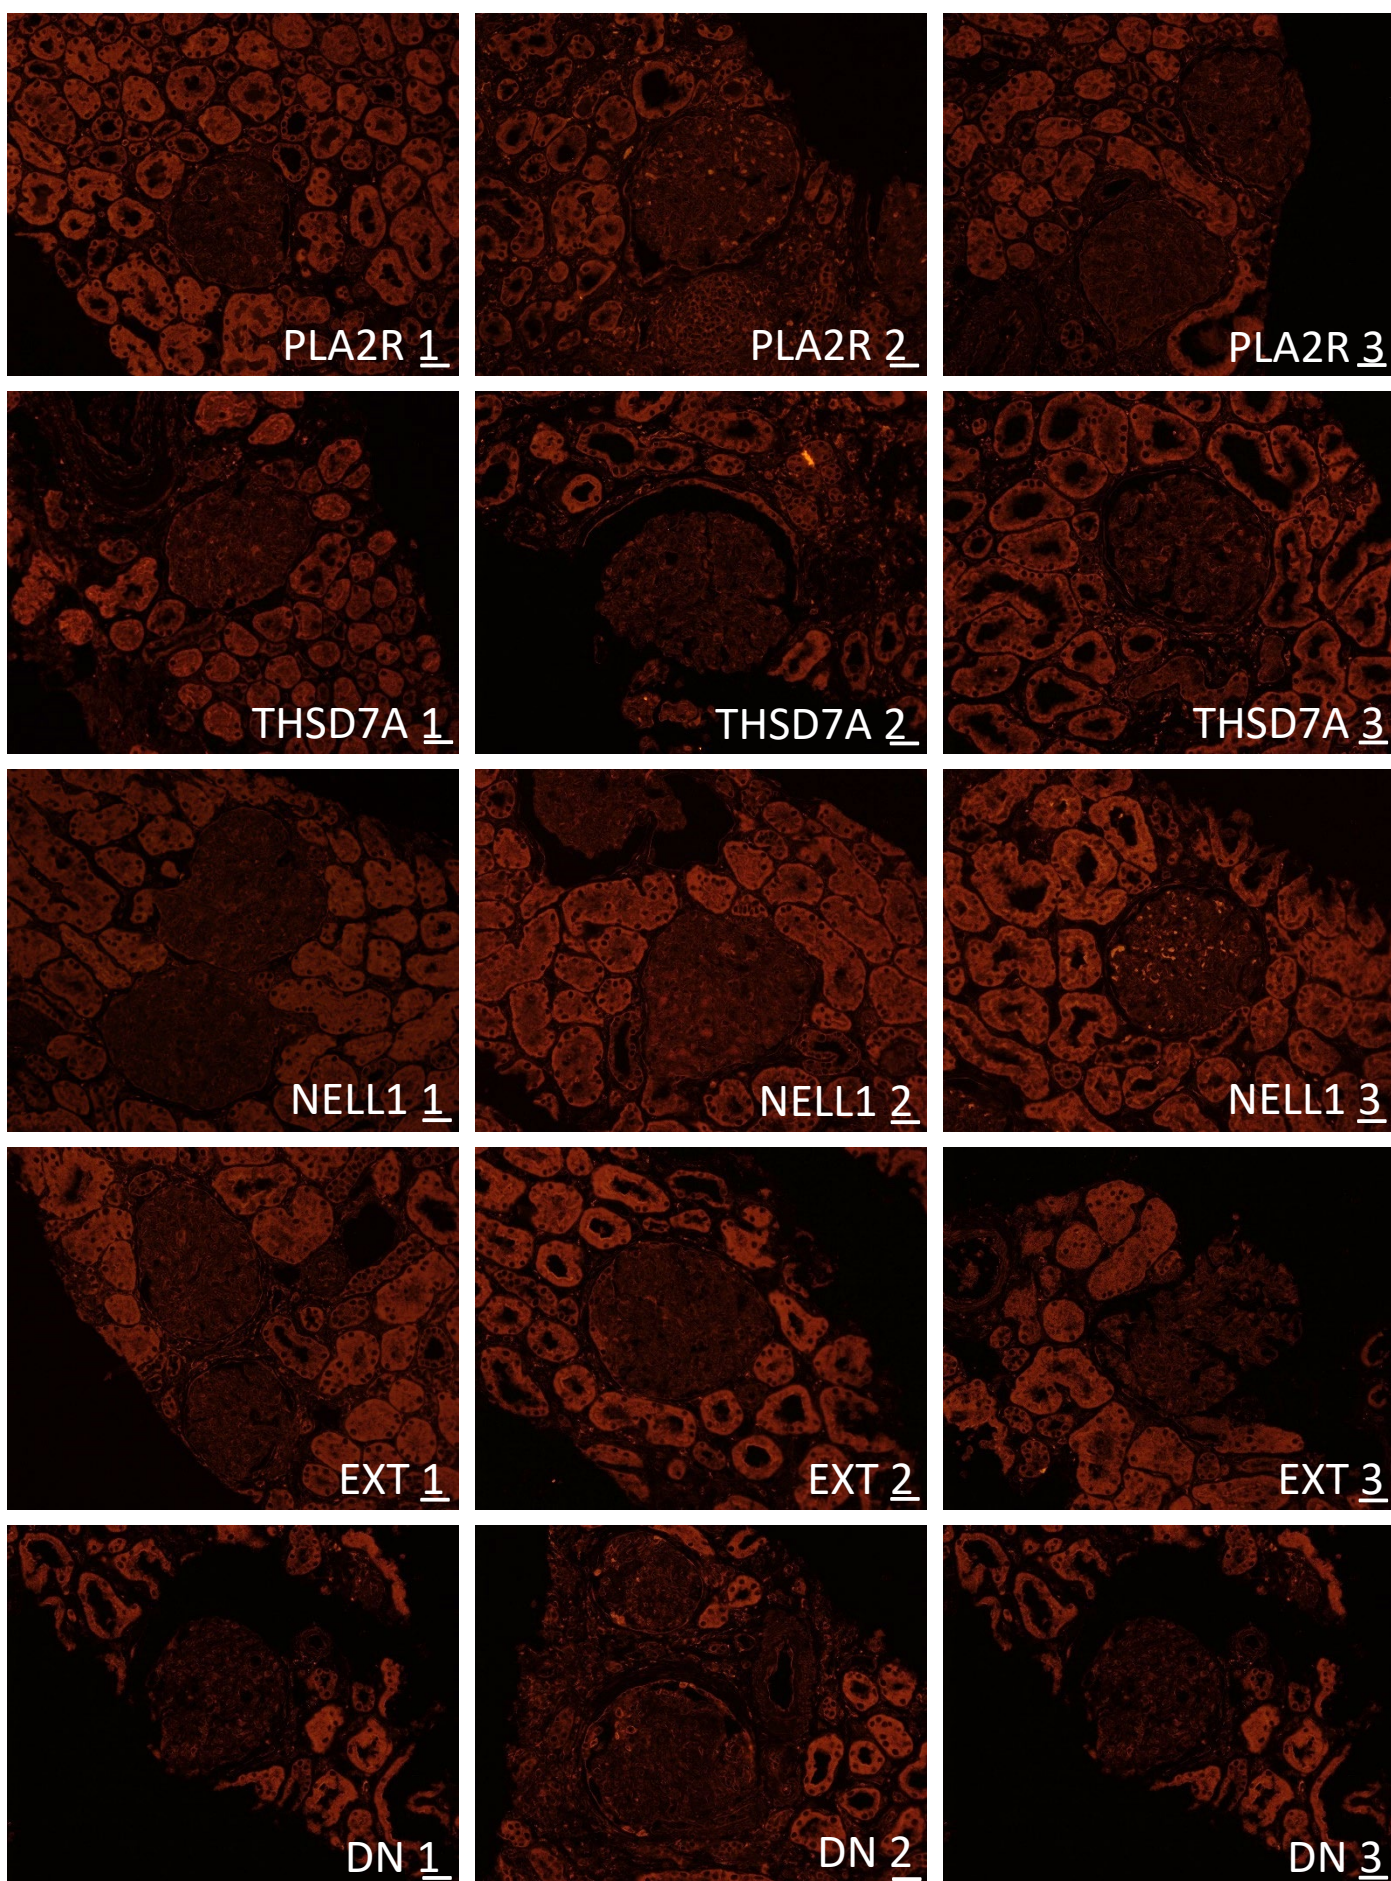

Negative controls for CD206 immunofluorescence staining



**Supplemental Figure 10.** Representative paraffin immunofluorescence images for the putative antigens.

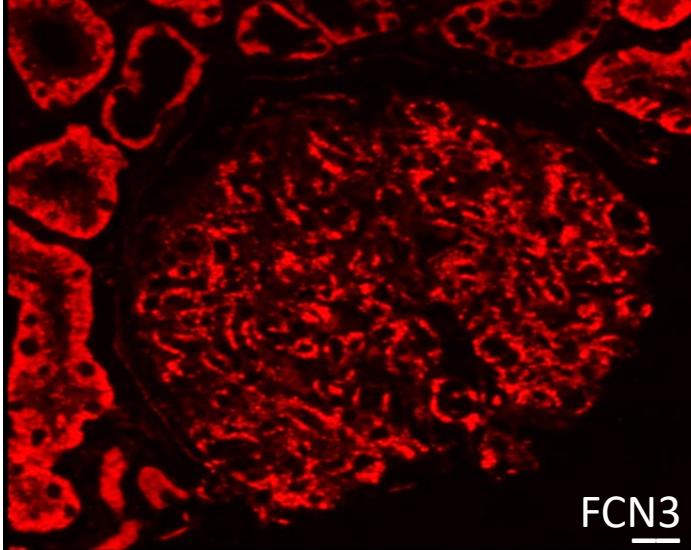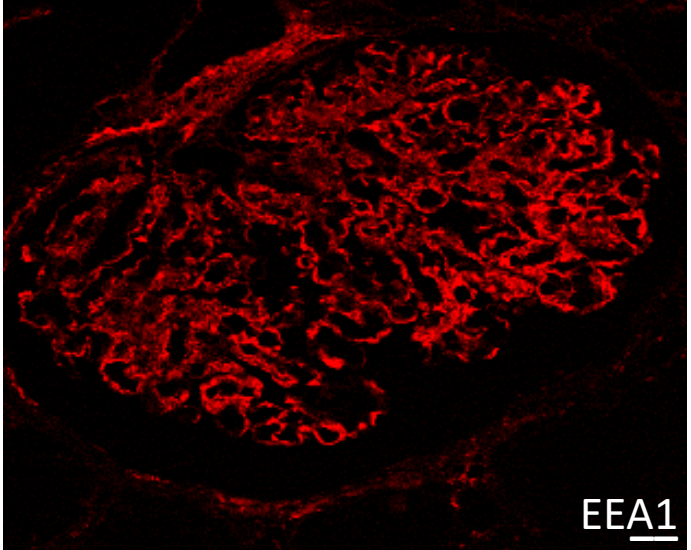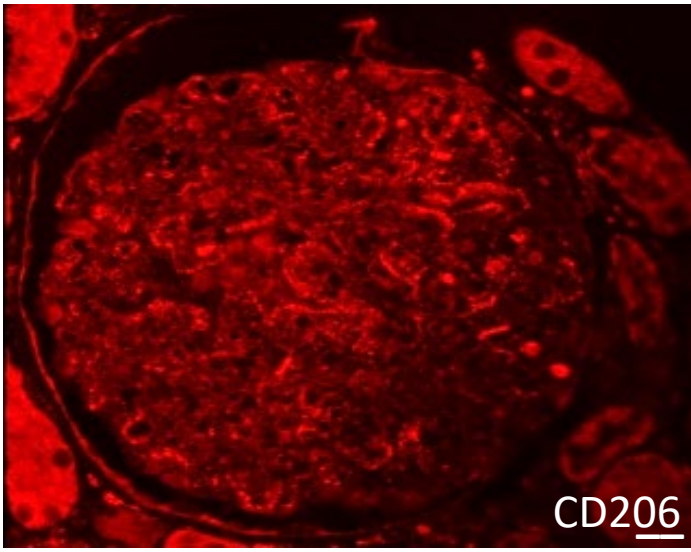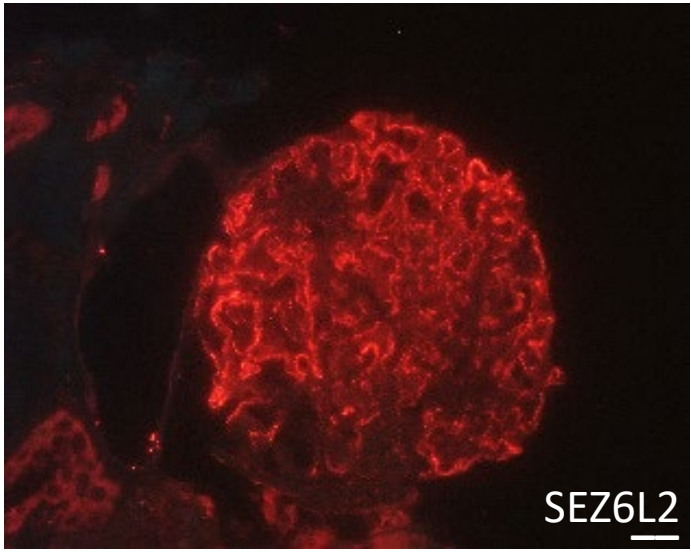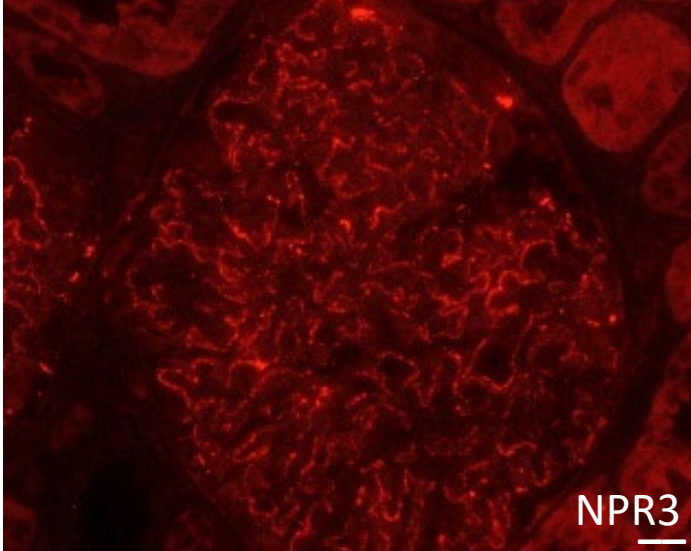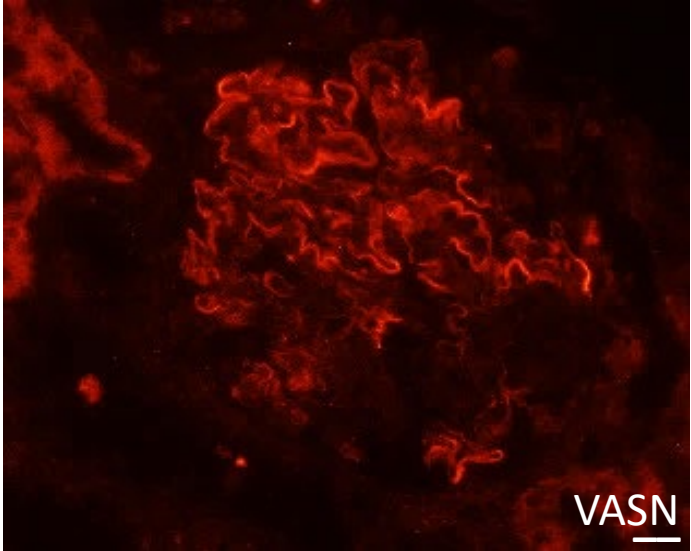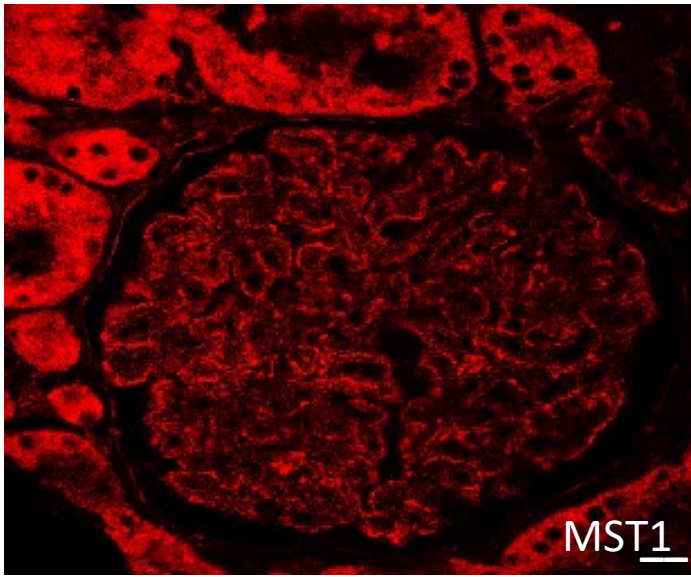

| Case | Biomarker | Lupus?        | Age | Sex | Cr  | Prot | IgA | IgG | IgM | C3 | C1q | TBM deposits | Mesangial deposits | Subendo deposits | Medical conditions           |
|------|-----------|---------------|-----|-----|-----|------|-----|-----|-----|----|-----|--------------|--------------------|------------------|------------------------------|
| 1    | FCN3      | Yes           | 51  | F   | Unk | Unk  | 1   | 3   | 0   | 1  | 2   | 0            | 1                  | 1                | SLE, HTN                     |
| 2    | FCN3      | Yes           | 56  | F   | 1.1 | 3.8  | 1   | 3   | 4   | 4  | 2   | 0            | 1                  | 1                | SLE                          |
| 3    | FCN3      | Yes (III + V) | 44  | M   | 3.2 | NR   | 1   | 2   | 1   | 2  | 1   | 1            | 1                  | 1                | SLE, HTN, ITP, APLS          |
| 4    | FCN3      | No            | 47  | M   | 1.3 | 3+   | 0   | 3   | 0   | 3  | 0   | 0            | 1                  | 0                | Untreated HBV                |
| 5    | FCN3      | Yes (III + V) | 22  | F   | 1   | 1    | 3   | 3   | 0   | 2  | 1   | 0            | 1                  | 1                | SLE, HTN, IUFD               |
| 6    | FCN3      | Yes           | 27  | F   | WNL | 1.9  | 0   | 3   | 2   | 1  | T   | 1            | 1                  | N/A (no EM)      | SLE, HTN, DM, obesity        |
| 7    | EEA1      | No            | 55  | M   | 1.4 | 8.8  | 1   | 3   | 0   | 3  | 0   | 0            | 0                  | 0                | None                         |
| 8    | EEA1      | No            | 31  | F   | 0.6 | 6    | 0   | 3   | 1   | 1  | 0   | 0            | 0                  | 0                | None                         |
| 9    | EEA1      | No            | 64  | F   | WNL | 5    | 0   | 3   | 0   | 2  | 0   | 0            | 0                  | 1                | HTN, hyperlipidemia, obesity |
| 10   | EEA1      | Yes (III + V) | 22  | F   | 2.7 | 2.1  | 0   | 3   | 0   | 0  | 0   | 0            | 1                  | N/A              | SLE                          |
| 11   | EEA1      | No            | 32  | M   | 1.7 | NR   | 0   | 3   | 0   | 2  | 0   | 0            | 1                  | 0                | HTN, HIV, syphilis           |
| 12   | EEA1      | Yes           | 50  | F   | 1.2 | Unk  | 0   | 2   | 1   | 1  | 0   | 0            | 1                  | 0                | SLE, rheumatoid arthritis    |
| 13   | EEA1      | No            | 33  | M   | 1.3 | NR   | T   | 2   | T   | 2  | 0   | 0            | 0                  | 0                | HTN, schizophrenia, smoking  |
| 14   | EEA1      | Yes           | 45  | F   | Unk | Unk  | 2   | 3   | 2   | 1  | 2   | 0            | 1                  | 1                | SLE                          |
| 15   | EEA1      | Yes           | 38  | F   | 5.8 | 3.8  | T   | 3   | 0   | 3  | 0   | 0            | 1                  | 1                | SLE, APLS, ITP, HTN, PE      |
| 16   | EEA1      | Yes           | 28  | F   | 0.6 | 1.9  | 0   | 3   | 0   | 2  | 1   | 0            | 1                  | 0                | SLE, PE, PRES, HTN, seizures |
| 17   | EEA1      | Yes           | 40  | F   | 0.6 | 0.8  | 1   | 3   | 1   | 2  | 1   | 0            | 1                  | 0                | SLE                          |
| 18   | EEA1      | Yes           | 56  | M   | 1.4 | Unk  |     | 3   | 3   | 3  | 3   | 0            | 1                  | 0                | SLE, APLS, smoking           |

|    |                     |     |    |   |     |     |   |   |   |   |   |   |   |   |                                                     |
|----|---------------------|-----|----|---|-----|-----|---|---|---|---|---|---|---|---|-----------------------------------------------------|
| 19 | EEA1                | No  | 68 | F | 0.5 | 2+  | 0 | 3 | 0 | 3 | 0 | 0 | 1 | 0 | Osteoarthritis, HTN, chronic pain                   |
| 20 | CD206 (index case)  | No  | 67 | F | 2.1 | 3   | T | 3 | 0 | T | 0 | 0 | 1 | 0 | Atheroemboli, scleroderma, HTN, pulmonary HTN       |
| 21 | SEZ6L2              | No  | 79 | M | 1.4 | 2   | 0 | 3 | 0 | T | 0 | 0 | 0 | 0 | HTN, BPH, GERD, DJD                                 |
| 22 | SEZ6L2 (index case) | No  | 64 | M | 0.9 | NR  | 0 | 3 | 0 | 0 | 0 | 0 | 0 | 0 | HTN                                                 |
| 23 | NPR3 (index case)   | No  | 62 | F | 1   | 4   | 0 | 3 | 0 | 2 | 0 | 0 | 1 | 0 | HTN, glucose intolerance, abdominal mass            |
| 24 | VASN (index case)   | No  | 20 | F | Unk | NR  | 0 | 3 | 0 | 3 | 0 | 0 | 1 | 0 | None                                                |
| 25 | VASN                | Yes | 41 | F | 0.7 | Unk | 0 | 3 | 0 | 0 | 0 | 0 | 1 | 0 | SLE                                                 |
| 26 | VASN                | Yes | 21 | F | 0.8 | 0.8 | 2 | 3 | 0 | 1 | 1 | 1 | 1 | 0 | SLE                                                 |
| 27 | VASN                | No  | 44 | F | 0.6 | 6.7 | 0 | 3 | 0 | 2 | 0 | 0 | 1 | 0 | None                                                |
| 28 | VASN                | No  | 38 | F | 0.8 | 2+  | 0 | 3 | 0 | 0 | 0 | 0 | 0 | 0 | RVT                                                 |
| 29 | VASN                | No  | 66 | M | 1.4 | NR  | 0 | 2 | 0 | 2 | 0 | 0 | 0 | 0 | Gout, scrotal cellulitis, arthritis, hyperlipidemia |
| 30 | VASN                | No  | 47 | M | WNL | NR  | 0 | 3 | 2 | 1 | 1 | 0 | 1 | 1 | Seizures, bipolar disorder, substance abuse, ANA+   |
| 31 | VASN                | No  | 84 | F | 1.3 | 4.9 | 0 | 3 | 0 | 3 | 0 | 1 | 1 | 0 | HTN, hypothyroidism, DJD                            |
| 32 | VASN                | No  | 21 | M | Unk | NR  | 1 | 3 | 2 | 2 | 2 | 0 | 0 | 0 | None                                                |



|    |                   |     |    |   |     |     |   |   |   |   |   |   |   |   |                                     |
|----|-------------------|-----|----|---|-----|-----|---|---|---|---|---|---|---|---|-------------------------------------|
| 33 | VASN              | No  | 34 | F | 0.6 | 8.9 | 3 | 3 | T | 1 | 0 | 0 | 1 | 0 | ANA positive, PE                    |
| 34 | VASN              | Yes | 32 | F | Unk | Unk | 1 | 3 | 1 | 1 | 1 | 1 | 1 | 0 | SLE                                 |
| 35 | VASN              | Yes | 46 | F | 1.8 | Unk | 1 | 3 | 1 | 2 | 2 | 1 | 1 | 1 | SLE                                 |
| 36 | MST1              | No  | 21 | F | 0.5 | 9.5 | 0 | 3 | 0 | 2 | 0 | 0 | 0 | 0 | HTN, 22 wk pregnancy, renal calculi |
| 37 | MST1              | No  | 22 | F | 0.9 | NR  | 3 | 3 | 1 | 1 | 0 | 1 | 0 | 0 | HTN, DVT, ANA/dsDNA positive        |
| 38 | MST1              | No  | 51 | F | Unk | 2.8 | 0 | 3 | 0 | 1 | 0 | 0 | 0 | 0 | HTN, MGUS                           |
| 39 | MST1 / VASN       | Yes | 32 | F | 0.6 | 1.9 | 1 | 2 | 1 | 2 | 2 | 1 | 1 | 1 | SLE, GERD                           |
| 40 | MST1              | No  | 64 | F | 0.6 | Unk | 0 | 3 | T | 0 | 0 | 0 | 0 | 1 | HTN, GERD, COPD, ANA positive       |
| 41 | MST1 (index case) | No  | 38 | F | Unk | 2+  | 0 | 3 | 0 | 3 | 0 | 0 | 1 | 0 | NSAID use, obesity                  |
| 42 | MST1              | No  | 67 | M | Unk | 1.5 | 1 | 3 | 0 | 1 | 0 | 0 | 0 | 0 | Pulmonary nodules                   |
| 43 | MST1              | Yes | 24 | M | 0.8 | Unk | 2 | 3 | 2 | 2 | 1 | 1 | 1 | 0 | SLE                                 |

**Supplemental Table S1.** Clinical and pathologic characteristics of MN patients positive for identified biomarkers.

**Abbreviations:** ANA, antinuclear antibodies; APLS, anti-phospholipid antibody syndrome; BPH, benign prostatic hypertrophy; COPD, chronic obstructive pulmonary disease; Cr, creatinine; DJD, degenerative joint disease/osteoarthritis; DM, diabetes mellitus; DVT, deep venous thrombosis; F, female; GERD, gastroesophageal reflux disease; HTN, hypertension; ITP, immune thrombocytopenic purpura; IUFD, intrauterine fetal demise; M, male; MGUS, monoclonal gammopathy of undetermined significance; NR, nephrotic range; N/A, not applicable/not available; NSAIDs, non-steroidal anti-inflammatory drugs; prot, proteinuria; PRES, posterior reversible encephalopathy syndrome; PE, pulmonary embolism; RA, rheumatoid arthritis; RVT, renal vein thrombosis; SLE, systemic lupus erythematosus; subendo, subendothelial deposits; TBM, tubular basement membrane; TIA, transient ischemic attack; WNL, within normal limits

| Case | Biomarker | MN or MLN | IgG1 | IgG2 | IgG3 | IgG4 |
|------|-----------|-----------|------|------|------|------|
| 2    | FCN3      | MLN       | 3    | 0    | 0    | T    |
| 6    | FCN3      | MLN       | 3    | 3    | 2    | 3    |
| 9    | EEA1      | MN        | 3    | 0    | 0    | 0    |
| 10   | EEA1      | MLN       | 3    | 1    | 1    | 0    |
| 12   | EEA1      | MN        | 0    | 1    | 0    | 3    |
| 13   | EEA1      | MN        | 3    | 3    | 0    | 3    |
| 15   | EEA1      | MLN       | 0    | 2    | 0    | 0    |
| 17   | EEA1      | MLN       | 2    | 1    | 0    | 0    |
| 18   | EEA1      | MLN       | 2    | 3    | 0    | 0    |
| 21   | SEZ6L2    | MN        | 2    | 0    | 0    | 3    |
| 29   | VASN      | MN        | 2    | 0    | 0    | 0    |
| 30   | VASN      | MN        | 3    | 3    | 3    | 3    |
| 31   | VASN      | MN        | 3    | 3    | 0    | 3    |
| 32   | VASN      | MN        | 3    | 0    | 3    | 0    |
| 36   | MST1      | MN        | 3    | 1    | 0    | 2    |
| 37   | MST1      | MN        | 3    | 3    | 0    | 3    |
| 39   | MST1/VASN | MLN       | 3    | 3    | 3    | 0    |

**Supplemental Table S2.** IgG subclass staining of biopsies positive for candidate antigens.
